# From Typical Sequences to Typical Genotypes

Omri Tal\*, Tat Dat Tran<sup>†</sup> and Jacobus Portegies<sup>‡</sup>

Max-Planck-Institute for Mathematics in the Sciences, Leipzig, Germany  
Inselstrasse 22, D-04103 Leipzig

October 13, 2016

## Abstract

We demonstrate an application of a core notion of information theory, that of typical sequences and their related properties, to analysis of population genetic data. Based on the asymptotic equipartition property (AEP) for non-stationary discrete-time sources producing independent symbols, we introduce the concepts of *typical genotypes* and *population entropy rate* and *cross entropy rate*. We analyze three perspectives on typical genotypes: a set perspective on the interplay of typical sets of genotypes from two populations, a geometric perspective on their structure in high dimensional space, and a statistical learning perspective on the prospects of constructing typical-set based classifiers. In particular, we show that such classifiers have a surprising resilience to noise originating from small population samples, and highlight the potential for further links between inference and communication.

*Keywords: typical sequences, typical genotypes, population entropy rate, population cross entropy rate, classification*

## 1 Introduction

We are drowning in information and starving for knowledge.  
- John Naisbitt.

In this paper we identify several intrinsic properties of long stretches of genetic sequences from multiple populations that justify an information theoretic approach in their analysis. Our central observation is that long genotypes consisting of polymorphisms from a source population may be considered as sequences of discrete symbols generated by a ‘source’ distribution, where the capacity to sequence long stretches of genomes is congruent with the use of large block sizes in the design of communication channels. Rather than arising *temporally as an ordered sequence of* symbols in a communication channel, genetic sequences are non-temporal linear outputs of a sequencing scheme. This perspective ultimately enables the utilization of important information-theoretic asymptotic properties in the analysis of population genetic data.

---

\*Corresponding author: Omri.Tal@mis.mpg.de

<sup>†</sup>trandat@mis.mpg.de

<sup>‡</sup>jacobus.portegies@mis.mpg.de

31 Specifically, we introduce the concept of *typical genotypes* for a population, analogous to the core  
32 notion of typical sequences in information theory. These are genotypes one typically expects to en-  
33 counter in a given population and are likely to represent the population very well. We analyze these  
34 typical genotypes from various perspectives. We show that it is possible that a genotype is typical  
35 to two different populations at once and give an algorithm that can quickly decide whether mutual  
36 typicality occurs, given standard models for two populations.

37 Crucially, we identify conditions in which it is *likely* that mutual typicality occurs asymptotically,  
38 that is, for genotypes consisting of a very high number of variants. What we observe, however, is that  
39 in this case, only a very small portion of typical genotypes for the latter population is typical for the  
40 first. This immediately suggests a classification scheme based on typical sets. We introduce two of  
41 such typical-set based classifiers and show that their error rates decay exponentially fast, as one would  
42 expect from a good classifier. Moreover, we show that such classifiers generally perform well even in  
43 the presence of sampling noise arising from small training sets.

44 From a mathematical point of view, a recurring difficulty is the non-stationarity of the source  
45 distribution, or in other words, that the markers vary in their frequency across loci. This prevents  
46 us from directly utilizing some of the standard results in information theory that apply to stationary  
47 sources, and required us to find more refined mathematical arguments instead.

## 48 1.1 Typical sequences and the *asymptotic equipartition property*

49 Information Theory (historically, Communication Theory) is at core concerned with the transmission  
50 of messages through a noisy channel as efficiently and reliably as possible. This primarily involves two  
51 themes, data *compression* (aka, *source coding*) and error correction (aka, *channel coding*). The former  
52 theme is mainly concerned with the attainable limits to data compression, while the latter involves the  
53 limits of information transfer rate for a particular source distribution and channel noise level. Both  
54 themes rely intrinsically on the notion of ‘typical sequences’.

55 A key insight of Shannon, the *asymptotic equipartition property* (AEP) forms the basis of many of  
56 the proofs in information theory. The property can be roughly paraphrased as “Almost everything is  
57 almost equally probable”, and is essentially based on the law of large numbers with respect to long  
58 sequences from a random source. Stated as a limit, for any sequence of i.i.d. random variables  $X_i$   
59 distributed according to  $X$  we have,

$$\lim_{n \rightarrow \infty} Pr \left[ \left| -\frac{1}{n} \log_2 p(X_1, X_2, \dots, X_n) - H(X) \right| < \varepsilon \right] = 1 \quad \forall \varepsilon > 0. \quad (1)$$

60 This property is expressed in terms of the information-theoretic notion of *empirical entropy*. This  
61 denotes the negative normalized log probability of a sequence  $x$ , an entity better suited for analysis  
62 than  $p(x)$ . This property leads naturally to the idea of typical sequences, which has its origins in  
63 Shannon’s original ground-breaking 1948 paper [Shannon, 1948]. This notion forms the heart of the  
64 central insights of Shannon with respect to the possibility of reliable signal communication, and features  
65 in the actual theorems and their formal proofs. The definition of a typical set  $A_\varepsilon^{(n)}$  with respect  
66 a distribution source  $X$ , its entropy  $H(X)$ , a (small)  $\varepsilon > 0$  and a (large)  $n$ , entails the set of all  
67 sequences of length  $n$  that may be generated by  $X$  such that,

$$2^{-n[H(X)+\varepsilon]} \leq p(x_1, \dots, x_n) \leq 2^{-n[H(X)-\varepsilon]} \quad (2)$$

68 where  $p(x_1, x_2, \dots, x_n)$  denotes the probability of any particular sequence from  $X$ .

69 If the source is binary and stationary it is intuitive to spot sequences that are possibly typical. For  
 70 instance, say we have a binary independent and identically distributed (i.i.d) source with a probability  
 71 for “1” of 0.1, then the sequence 0000100010000000000000100000 0011 seems very possibly typical (as  
 72 it has roughly 10% 1s), while the sequence 0110100110 1100101111101001001011 is most probably not.  
 73 Note that typical sequences are not the most probable ones; evidently, the most probable for this source  
 74 is 00000000000000000000000000000000.

75 The interesting and useful properties of typical sets are a result of the AEP, and are thus *asymptotic*  
 76 in nature: they obtain for large enough  $n$ , given any small arbitrary ‘threshold’  $\varepsilon$ . Formally, for any  
 77  $\varepsilon > 0$  arbitrarily small,  $n$  can be chosen sufficiently large such that:

- 78 (a) the probability of a sequence from  $X$  being drawn from  $A_\varepsilon^{(n)}$  is greater than  $1 - \varepsilon$ , and  
 79 (b)  $(1 - \varepsilon)2^{n(H(X)-\varepsilon)} \leq |A_\varepsilon^{(n)}| \leq 2^{n(H(X)+\varepsilon)}$ .

80 Thus at high dimensionality ( $n \gg 1$ ), the typical set has probability nearly 1, the number of elements in  
 81 the typical set is nearly  $2^{nH(X)}$ , and consequently all elements of the typical set are nearly equiprobable  
 82 with a probability tending to  $2^{-nH(X)}$  ([Cover and Thomas, 2006] Theorem 3.1.2).

83 The set of all sequences of length  $n$  is then commonly divided into two sets, the *typical set*, where  
 84 the *sample entropy* or the *empirical entropy*, denoting the negative normalized log probability of a  
 85 sequence, is in close proximity ( $\varepsilon$ ) to the true entropy of the source per Eq. (2), and the non-typical  
 86 set, which contains the other sequences (Fig. 1). We shall focus our attention on the typical set and  
 87 any property that is true in high probability for typical sequences will determine the behaviour of  
 88 almost any long sequence sampled from the distribution.

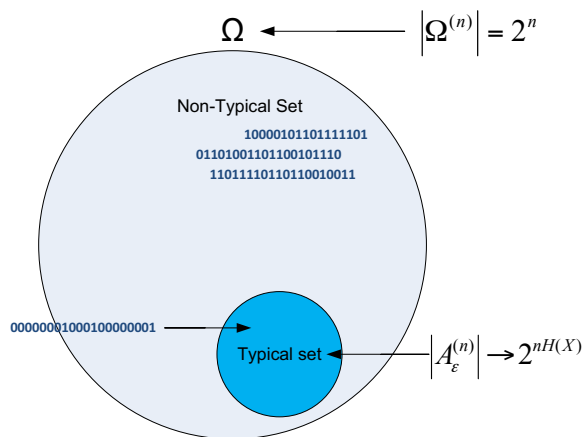

Fig. 1: The universe of all possible sequences with respect to a source distribution in a high dimensional space can be divided into two exclusive subsets, typical and non-typical. Here, we illustrate one typical sequence and a few very non-typical sequences corresponding to an i.i.d. source with probability of 0.1 for “1” for some small epsilon and high  $n$ .

## 89 1.2 The Population Model

90 We consider for simplicity two *haploid* populations  $P$  and  $Q$  that are in linkage equilibrium (LE)  
 91 across loci, and where genotypes constitute in a sequence of *Single Nucleotide Polymorphisms* (SNPs).  
 92 A SNP is the most common type of genetic variant – a single base pair mutation at a specific locus  
 93 usually consisting of two alleles (the rare/minor allele frequency is  $>1\%$ ). Each SNP  $X_i$  is coded 0  
 94 or 1 arbitrarily, and SNPs from population  $P$  have frequencies (probability that  $X_i = 1$ )  $p_i$  while  
 95 those from population  $Q$  have frequencies  $q_i$ . Closely following practical settings, we assume some

96 arbitrary small cut-off frequency for SNP frequencies, such that frequencies in any population cannot  
97 be arbitrarily close to fixation,  $0 < \delta < p_i, q_i < 1 - \delta$ . Each genotype population sample is essentially  
98 a long sequence of biallelic SNPs, e.g., GCGCCGGGCGCCGGCGCGGGGG, which is then binary  
99 coded according to the convention above, e.g., 0101100010110010100000. The probability of such a  
100 genotype  $x = (x_1, x_2, \dots, x_n)$  from  $P$  is then  $p(x) = (1 - p_1)p_2(1 - p_3)p_4p_5 \dots p_n$ . We first assume  
101 the SNP frequencies are fully known (as if an infinite population sample is used in the learning stage),  
102 and later on relax this assumption in the section on small-sample related noise. Finally, for analyzing  
103 properties in expectation and deriving asymptotic statements we assume  $p_i$  and  $q_i$  are sampled i.i.d.  
104 from frequency distributions. For making explicit calculations and numerical simulations we employ a  
105 parameterized Beta distribution for SNP frequencies, such that  $p_i \sim B(\alpha_P, \beta_P), q_i \sim B(\alpha_Q, \beta_Q)$ , as is  
106 standard in population genetic analysis ([Rannala and Mountain, 1997]). The use of a common Beta  
107 model for allele frequencies was adopted for both its mathematical simplicity and goodness of fit to  
108 empirical distributions from natural populations, and is by no means a prerequisite for arriving at our  
109 main results. Finally, to simulate our results, we sample SNP frequencies from these distributions and  
110 then sample long genotypes from the multivariate Bernoulli distribution for populations  $P$  and  $Q$  that  
111 are parameterized by  $p_i$  and  $q_i, i : 1 \dots n$ , respectively.

### 112 1.3 Properties of sequences of genetic variants

113 Population SNP data have several interesting ‘set-typicality’ properties that may render them amenable  
114 to information theoretic analysis:

- 115 (a) SNPs typically are bi-valued, simplifying modeling SNPs as sequences of binary symbols from a  
116 communication source.
- 117 (b) The standard assumption of *linkage equilibrium* within local populations translates to a statistical  
118 independence of  $X_i$ , which in turn enables the applicability of the AEP (for a non-stationary  
119 source with independent symbols).
- 120 (c) SNPs have typically differing frequencies across loci (i.e., analogous to a ‘nonstationary’ source),  
121 resulting in statistical terms in deviations from i.i.d. samples; this property makes an information  
122 theoretic analysis of SNP genotypes more challenging, being highly dependent on the existence  
123 of advanced forms of the AEP.
- 124 (d) The recent availability of very large number of SNPs from high-throughput sequencing of genomes  
125 enables the consideration of very long sequences (size  $n$ ), or ‘block sizes’ in information theoretic  
126 terms, with asymptotic qualities.
- 127 (e) SNP frequencies are commonly above some arbitrary *cut-off frequency*, so that the *variance of*  
128  $\log_2(p_i)$  is bounded, a requirement for a nonstationary form of the AEP to hold (as we shall see).
- 129 (f) SNPs typically have low minor allele frequencies (MAF) in natural populations (Fig. 2A). If  
130 we consider long sequences of SNPs as our genotypes, then the set of typical sequences from a  
131 population will be small (of asymptotic size  $2^{nH(X)}$ ) relative to the ‘universe’ set (of size  $2^n$ ) of  
132 all possible genotypes. This property enables treating such typical sequences as effective proxies  
133 for their source population.
- 134 (g) Different populations often have different SNP-based genetic diversities (see the wide variation  
135 in heterozygosities across human populations in Fig. 2C), and SNP frequencies are often highly  
136 correlated between close populations (Fig. 2B). These properties have particular interpretations  
137 when populations are seen as communication ‘sources’.

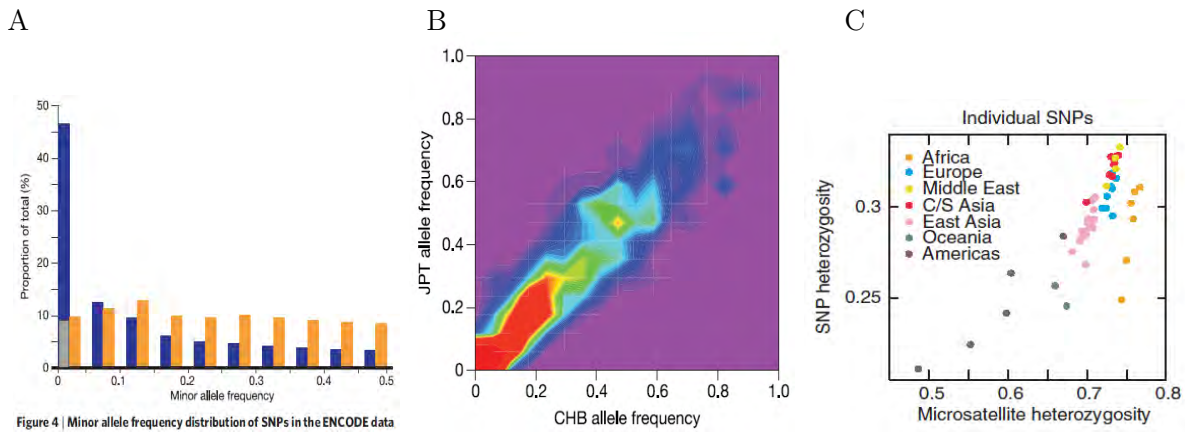

Figure 4 | Minor allele frequency distribution of SNPs in the ENCODE data

Fig. 2: Human populations typically exhibit predominately low SNP frequencies (and thus commonly modeled by a Beta distribution highly skewed to the left), which are correlated between close populations (due to a split from common ancestry), and of differing average frequencies across worldwide populations. A: SNPs from the HapMap ENCODE regions according to minor allele frequency (in blue) [Consortium, 2005] [Borrowed with permission from *Nature* 2005; 437(7063): 1299–1320, Fig. 4]. | B: SNP frequencies from the HapMap ENCODE project between (the relatively close) JPT and CHB populations are highly correlated between the two populations at each locus [Borrowed with permission from *Nature* 2005; 437(7063): 1299–1320, Fig. 6]. | C: Differing SNP heterozygosity across worldwide populations with most diversity occurring in Africa and least in the Americas and Oceania. [Borrowed with permission from *Nature Genetics* 38, 1251 – 1260 (2006), Fig. 3].

#### 138 1.4 AEPs for genotypes from multiple populations

139 To formulate AEP statements for genotypes comprised of long stretches of population variants, we  
 140 first define two central concepts: population entropy rate and cross entropy rate. The entropy of  
 141 a population with respect to a set of loci has been previously invoked in formulating measures of  
 142 population diversity or differentiation with respect to a single locus ([Lewontin, 1995]). Since SNPs  
 143 typically have differing frequencies across loci, translating in information theoretic parlance to ‘non-  
 144 stationarity’ of the source, one cannot simply employ entropy  $H$  as a variation measure of a population.  
 145 Instead, we need to define a population *entropy rate* across loci. Thus, with respect to a set of SNP  
 146 frequencies in population  $P$ ,

$$\overline{H}_n(P) = \frac{1}{n} H(p_1, p_2, \dots, p_n) = \frac{1}{n} \sum_{i=1}^n H(p_i) = -\frac{1}{n} \sum_{i=1}^n \left( p_i \log_2 p_i + (1 - p_i) \log_2 (1 - p_i) \right) \quad (3)$$

147 with the second equality due to independence across loci (absence of LD).<sup>1</sup> We may now extend this  
 148 concept by incorporating a second population that serves as the source, while the log-probabilities  
 149 remain with respect to the first. In information theoretic terms, the cross entropy  $H(p, q)$  measures  
 150 the average number of bits required to compress symbols from a source distribution  $P$  if the coder is  
 151 optimized for distribution  $Q$ , different than the true underlying distribution. For univariate variables,  
 152 the cross entropy can be expressed in terms of the Kullback Leibler divergence (also known as *relative*  
 153 *entropy*),

$$H(q, p) = \mathbb{E}_Q(-\log P) = H(P) + D_{KL}(Q \| P).$$

154 where we use lower-case in  $H(p, q)$  to distinguish this notion from the *joint entropy*, commonly denoted  
 155  $H(P, Q)$ . The *population cross entropy rate* is then simply an average over  $n$  loci,

$$\overline{H}_n(q, p) = \mathbb{E}_Q \left[ -\frac{1}{n} \log_2 p(x_1, \dots, x_n) \right] = \frac{1}{n} \sum_{i=1}^n \left( q_i \log_2 p_i + (1 - q_i) \log_2 (1 - p_i) \right)$$

<sup>1</sup>Note that in probability theory, the entropy rate or *source information rate* of a stochastic process is defined *asymptotically*,  $\overline{H}(X) = \lim_{n \rightarrow \infty} H(X_1, X_2, \dots, X_n)/n$ , when this limit exists.

156 and similarly for  $\overline{H}_n(p, q)$ .

157 Formally, if genotypes originate from distribution  $P$ , then by the non-stationary version of the AEP  
 158 (see Appendix B.4.1 part 1) their log-probability with respect to  $P$  converges to the entropy rate of  
 159  $P$ ,

$$\lim_{n \rightarrow \infty} Pr \left[ \left| -\frac{1}{n} \log_2 p(X_1, \dots, X_n) - \overline{H}_n(P) \right| < \varepsilon \mid X \sim P \right] = 1 \quad \forall \varepsilon > 0 \quad (4)$$

160 whereas if genotypes originate from distribution  $Q$ , then their log-probability with respect to  $P$  con-  
 161 verges to the cross entropy rate of  $Q$  with respect to  $P$ , essentially a ‘cross entropy AEP’ for non-  
 162 stationary sources (see Appendix B.4.1 part 2),

$$\lim_{n \rightarrow \infty} Pr \left[ \left| -\frac{1}{n} \log_2 p(X_1, \dots, X_n) - \overline{H}_n(q, p) \right| < \varepsilon \mid X \sim Q \right] = 1 \quad \forall \varepsilon > 0. \quad (5)$$

## 163 1.5 Typical genotypes

164 This consideration of the ‘set-typicality’ properties along with AEPs for our genotypes suggests that a  
 165 notion of *typical-genotypes* may be fruitful for characterizing population samples. We therefore extend  
 166 the standard definition of a typical set to support a non-stationary source, which better captures our  
 167 population model. The set of typical genotypes of length  $n$  with respect to the *population entropy rate*  
 168 of  $P$  and some small arbitrary  $\varepsilon$ , comprises of all genotypes whose frequency is within the bounds,

$$2^{-n[\overline{H}_n(P)+\varepsilon]} \leq p(x_1, \dots, x_n) \leq 2^{-n[\overline{H}_n(P)-\varepsilon]}. \quad (6)$$

169 For notational simplicity, we will denote by  $q(x_1, x_2, \dots, x_n)$  the corresponding probability of a  
 170 genotype from population  $Q$ . Since the definition of a typical set pertains for any  $n$  and  $\varepsilon$ , our  
 171 justification in invoking this concept in this context does not have to rely on asymptotic properties  
 172 only, but holds naturally by virtue of commonly large  $n$  for SNPs.

## 173 1.6 Quantitative AEPs

174 It is beneficial to additionally formulate quantitative, non-stationary versions of the AEP theorems.  
 175 Given that a genotype of length  $n$  is sampled from population  $P$ , the probability that it is not typical  
 176 is bounded by

$$Pr \left[ \left| -\frac{1}{n} \log_2 p(X_1, \dots, X_n) - \overline{H}_n(P) \right| > \varepsilon \mid X \sim P \right] \leq 2 \exp \left( -\frac{2n\varepsilon^2}{\log^2 \frac{\delta}{1-\delta}} \right).$$

177 This estimate is proved in Appendix C.1. In the same way, the probability that the log probability  
 178 under  $P$  deviates more than  $\varepsilon$  from the cross entropy rate, is estimated in the following quantitative  
 179 version of a ‘cross entropy AEP’ for non-stationary sources,

$$Pr \left[ \left| -\frac{1}{n} \log_2 p(X_1, \dots, X_n) - \overline{H}_n(q, p) \right| > \varepsilon \mid X \sim Q \right] \leq 2 \exp \left( -\frac{2n\varepsilon^2}{\log^2 \frac{\delta}{1-\delta}} \right).$$

180 The corresponding non-quantitative versions of the AEPs in Eq. (4) and (5) are obtained by letting  $n$   
 181 approach infinity.

182 Since the above inequalities hold for every  $n$  and  $\varepsilon > 0$ , we can for instance choose,

$$\varepsilon(n) = \sqrt{\frac{\log^2 \frac{\delta}{1-\delta} \log_2 n}{n}}$$



183 to conclude that,

$$Pr \left[ \left| -\frac{1}{n} \log_2 p(X_1, \dots, X_n) - \overline{H}_n(P) \right| > \varepsilon(n) \mid X \sim P \right] \leq \frac{2}{n} \quad (7)$$

184 and similarly,

$$Pr \left[ \left| -\frac{1}{n} \log_2 p(X_1, \dots, X_n) - \overline{H}_n(q, p) \right| > \varepsilon(n) \mid X \sim Q \right] \leq \frac{2}{n}. \quad (8)$$

185 This shows that the deviation from the entropy rate practically scales as  $\frac{1}{\sqrt{n}}$ , which is what one would  
 186 expect also from a central limit theorem. A more careful analysis in Appendix C.1 also shows that the  
 187 scale  $\log^2 \frac{\delta}{1-\delta}$  may actually be replaced by the sum

$$\frac{1}{n} \sum_{i=1}^n \log^2 \frac{p_i}{1-p_i} \quad \text{or} \quad \frac{1}{n} \sum_{i=1}^n \log^2 \frac{q_i}{1-q_i}$$

188 which for large  $n$  will be close to their expectation value and therefore are usually smaller for larger  
 189 entropy rates. This may explain why the spread away from the entropy rate seems smaller for higher  
 190 entropy rates. Fig. 3 depicts numerical simulations of the convergence rate of the AEPs under typical  
 population scenarios.

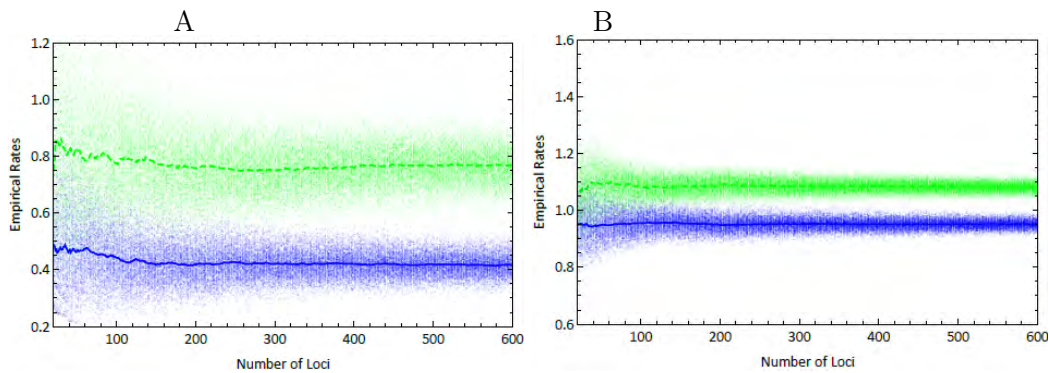

Fig. 3: Numerical simulation of the convergence rate of the AEPs under two scenarios of population parameters, around the entropy rate  $\overline{H}_n(Q)$  (blue) and the cross entropy rate  $\overline{H}_n(p, q)$  (green, dashed). A: Low entropy populations (Beta model w/  $\alpha_P = 4/\beta_P = 20, \alpha_Q = 2/\beta_Q = 20; F_{ST} = 0.032$ ). | B: high entropy populations (Beta model w/  $\alpha_P = 24/\beta_P = 20, \alpha_Q = 14/\beta_Q = 20; F_{ST} = 0.032$ ).

191

## 192 1.7 The log-probability space

193 The AEP theorems of Eqs. (4-8) manifest as increasingly dense clusters of population samples on  
 194 a log-probability space, centered on entropy and cross entropy rates, depending on their population  
 195 of origin. To fully capture the interplay of genotype samples from the two source populations, and  
 196 the information theoretic quantities of entropy and cross entropy rates, we take a two-dimensional  
 197 perspective of the log-probability space. We should expect samples from the two populations to cluster  
 198 around the *intersection* of the entropy and cross entropy rates of their respective populations, with a  
 199 concentration that increases with the number of loci included in analysis. Crucially, typical genotypes  
 200 should cluster tighter than general samples around the entropy and cross entropy rates intersection,  
 201 since typical sequences are by definition constrained by some  $\varepsilon > 0$ . These results are illustrated in  
 202 Fig. 4.

203 The divergent modes of concentration on the log-probability plot of samples from the two popula-  
 204 tions suggest that the *proximity* of the entropy and cross entropy rates is an important metric in the  
 205 context of population assignment for genotypic samples, as we shall see in what follows.

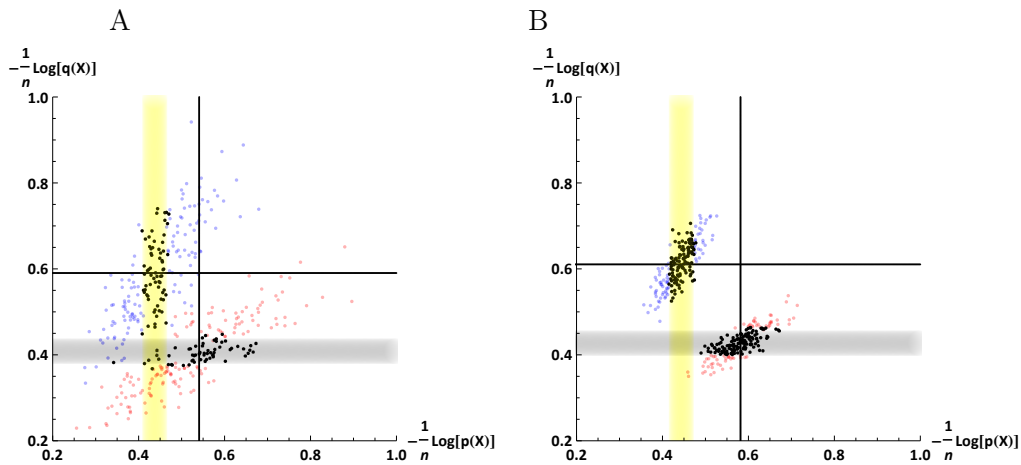

Fig. 4: Samples from two different populations become clearly distinguished on a 2D log-probability plot when high number of loci are included in analysis, clustering around the intersection of the entropy (wide lines) and cross entropy (thin lines) rates of their respective populations. The width of the entropy stripes is twice  $\varepsilon$  to reflect the typicality criteria of Eq. (6), where here  $\varepsilon = 0.03$ . In this simulation, 200 genotype samples of 100 SNP loci (panel A) and 600 SNP loci (panel B) were drawn from each of the two populations of similar entropy rates and  $F_{ST} = 0.05$ , where allele frequencies were modeled on Beta distributions ( $\alpha = 1, \beta = 8$  for both populations).

## 206 2 Set perspective on typical genotypes

207 Before we approach the task of constructing classifiers for population genetic samples based on the  
 208 notion of typicality, we present two perspectives on the interplay of typical sets: from their set-  
 209 overlap and exclusivity, and from their geometric dispersion. In particular, we will be interested in  
 210 the asymptotic properties due to the high dimensional nature of genotypes (with the inclusion of large  
 211 number of SNPs). Our hope would be that under expected population model of real population SNP  
 212 data, sets of typical genotypes from diverse populations *asymptotically* become non-overlapping and  
 213 good proxies for their respective sources.

### 214 2.1 Mutual and exclusive typicality

215 We first define the concept of mutual typicality. Formally, given  $P, Q$  and small  $\varepsilon_p > 0$  and  $\varepsilon_q > 0$ ,  
 216 we would like to know whether the two typical sets partially overlap, i.e., is there at least one  $x =$   
 217  $(x_1, \dots, x_n)$  such that  $x$  is *mutually typical* to both  $P$  and  $Q$ ? Any such sequence  $x$  would need to  
 218 satisfy the two inequalities,

$$\begin{aligned} & \text{given } P, Q \text{ and } \varepsilon_P, \varepsilon_Q > 0 \\ & \left\{ \begin{array}{l} \left| -\frac{1}{n} \log_2 p(x_1, \dots, x_n) - \overline{H}_n(P) \right| < \varepsilon_P, \\ \left| -\frac{1}{n} \log_2 q(x_1, \dots, x_n) - \overline{H}_n(Q) \right| < \varepsilon_Q \end{array} \right. \end{aligned} \quad (9)$$

219 or equivalently as a set of four *linear programming* inequalities of degree  $n$ ,

$$\left\{ \begin{array}{l} -n\overline{H}_n(P) - \sum_{i=1}^n \log_2(1 - p_i) + n\varepsilon_P > \sum_{i=1}^n x_i \log_2 \frac{p_i}{1-p_i} > -n\overline{H}_n(P) - \sum_{i=1}^n \log_2(1 - p_i) - n\varepsilon_P \\ -n\overline{H}_n(Q) - \sum_{i=1}^n \log_2(1 - q_i) + n\varepsilon_Q > \sum_{i=1}^n x_i \log_2 \frac{q_i}{1-q_i} > -n\overline{H}_n(Q) - \sum_{i=1}^n \log_2(1 - q_i) - n\varepsilon_Q. \end{array} \right. \quad (10)$$



220 Notice that our notion of mutual typicality is conceptually different to the standard informa-  
 221 tion theoretic concept of ‘joint typicality’, which concerns whether two different sequences are each  
 222 marginally typical and at the same time typical with respect to the joint distribution (a central concept  
 223 in Shannon’s channel coding theorem).

224 The above formulation (for a finite  $n$ ) is essentially a 0 – 1 *integer programming with no opti-*  
 225 *mization* problem: given  $n$  Boolean variables and  $m$  ( $= 4$  in this case) linear constraints, the prob-  
 226 lem is to find an assignment of either 0 or 1 to the variables such that all constraints are satisfied  
 227 ([Impagliazzo et al., 2014]). The ‘no optimization’ qualification reflects the omission of an objective  
 228 function to be optimized that is usually an integral part of a linear programming framework, while only  
 229 considering the problem of deciding if a set of constraints is feasible. This special case of an integer  
 230 programming is a decision rather than optimization problem, and as such is *NP-complete* rather than  
 231 *NP-hard*. In fact, 0 – 1 *integer programming with no optimization* is one of Karp’s 21 *NP-complete*  
 232 *problems* ([Zuckerman, 1996]). Crucially for our purposes, the NP completeness means that it is not  
 233 readily amenable to resolution for a large  $n$ , as our genotypic framework typically demands. Never-  
 234 theless, for small values of  $n$  one may solve the integer programming problem and infer the existence  
 235 of mutual or exclusive typicality.

236 As with other NP-complete problems, high-dimensional instances are intractable and so heuristic  
 237 methods must be used instead. We shall see that for large  $n$ , an approximate solution to the problem  
 238 of mutual typicality can be found very efficiently, since the integer programming problem is well  
 239 approximated by a *linear* programming problem. We slightly simplify the problem, making it effectively  
 240 independent of the choice of  $\varepsilon_P$  and  $\varepsilon_Q$ . Thus, we ask whether given *any* small  $\varepsilon_P$  and  $\varepsilon_Q$  there exists  
 241 an overlap of the two typical sets for high values of  $n$ . Next, we simulate the log-probability space  
 242 with samples drawn from a *uniform* (i.e., max entropy) distribution, so that a maximal set of different  
 243 genotypes from the total  $2^n$  universe is captured. The cross entropy AEP of Eq. (5) directly implies  
 244 that asymptotically the density of this domain is concentrated at the intersection of two cross entropy  
 245 rates,  $\overline{H}_n(u, p)$  and  $\overline{H}_n(u, q)$ , where  $U$  is the uniform distribution. This coordinate may be expressed  
 246 as a function of the SNP frequencies of  $P$  and  $Q$ ,

$$\begin{cases} \mathbb{E}_U \left[ -\frac{1}{n} \log_2 p(X_1, \dots, X_n) \right] = \overline{H}_n(u, p) = -\frac{1}{n} \log_2 \prod_{i=1}^n \sqrt{p_i(1-p_i)} \\ \mathbb{E}_U \left[ -\frac{1}{n} \log_2 q(X_1, \dots, X_n) \right] = \overline{H}_n(u, q) = -\frac{1}{n} \log_2 \prod_{i=1}^n \sqrt{q_i(1-q_i)}. \end{cases}$$

247 The contour of this domain is prescribed within boundaries which are the maximal and minimal  
 248 empirical entropy values with respect to  $P$  and  $Q$  for any of the possible  $2^n$  genotypes,

$$\begin{aligned} \max_P &= \max_{x \in [0,1]^n} \left[ -\frac{1}{n} \log_2 p(x_1, \dots, x_n) \right] \\ &= -\frac{1}{n} \sum_{i=1}^n \log_2 \min\{p_i, 1-p_i\}, \\ \min_P &= \min_{x \in [0,1]^n} \left[ -\frac{1}{n} \log_2 p(x_1, \dots, x_n) \right] \\ &= -\frac{1}{n} \sum_{i=1}^n \log_2 \max\{p_i, 1-p_i\}, \end{aligned} \tag{11}$$

249 and similarly for population  $Q$ .

250 From Eq. (11) it is evident that these boundaries are an *average* across loci and therefore will  
 251 depend on the parameters of the population model, rather than on the dimensionality  $n$ . However,  
 252 since the domain inscribed by all possible samples on the log-probability space does not include the

253 whole rectangular area prescribed by the boundaries, knowledge of these boundaries is insufficient for  
 254 determining whether the intersection of the two entropy rates (i.e., the location where samples are  
 255 asymptotically mutually typical) lies within the domain or is external to it.

256 In Theorem C.3.1 in the appendix we actually show that the domain converges (in the so-called  
 257 Hausdorff distance) to a fixed, convex set, and provide an expression for the *contour* of this domain.  
 258 The converge rate is approximately  $1/\sqrt{n}$ , and therefore even for relatively small values of  $n$  the  
 259 convex set is already a good approximation for the domain. This formulation, in conjunction with the  
 260 entropy rates of  $P$  and  $Q$ , will then allow to immediately determine whether asymptotically there are  
 261 mutually-typical genotypes (a solution to Eq. (10) for high  $n$ ): if the intersection of the two entropy  
 262 rates lies within the genotype domain then for any  $\varepsilon_P$  and  $\varepsilon_Q$  chosen as small as we wish, there will be  
 263 mutual typicality for some non-empty subset of genotypes; else, there will only be exclusive typicality  
 264 (a consequence of the convergence in the Hausdorff distance at the given rate is that the domain is  
 265 sufficiently non-porous, with porousness bounded by  $1/n$ ). Fig. 5 depicts numerical simulations of this  
 266 domain along with its computed contour at the asymptotic limit, for two representative scenarios of  
 267 mutual and exclusive typicality.

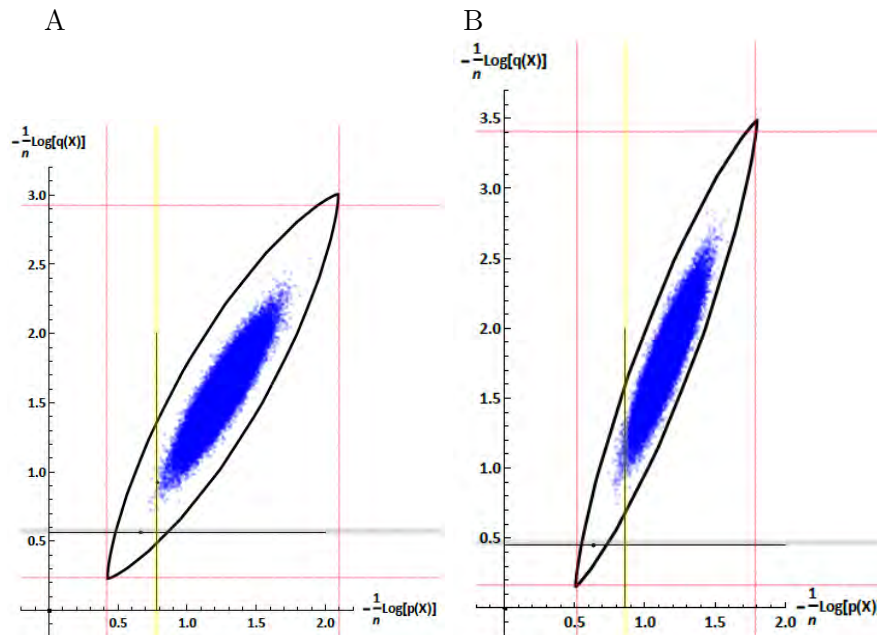

Fig. 5: Instances of ‘source-less’ mutual and exclusive typicality scenarios for populations  $P$  and  $Q$  at the asymptotic limit for  $n$ . A simulation of the analytic formulation of a contour of the domain inscribed by all samples drawn from the uniform distribution over the space, was overlaid on top of a simulation of a plot of samples from this uniform distribution, with respect to their log-probability. The wide stripes represent the entropy rates of  $P$  (yellow) and  $Q$  (grey). The thin border lines represent the minimum and maximum attainable values for samples from the specific population distributions. A: the intersection of the two entropy rates lies within the domain, implying existence of mutual typicality (populations modeled on Beta distributions for SNP frequencies with  $\alpha_P = 6/\beta_P = 18$ ;  $\alpha_Q = 3/\beta_Q = 18$ , and using  $n = 40$  loci and 60K samples in the domain simulation). | B: the intersection lies outside the domain, implying merely exclusive typicality (populations modeled on Beta distributions for SNP frequencies with  $\alpha_P = 15/\beta_P = 36$ ;  $\alpha_Q = 4/\beta_Q = 36$ , and using  $n = 40$  loci and 60K samples in the domain simulation). The intersection of the cross entropy and entropy rates are marked as small dots on the entropy rate lines, merely to indicate where highest density would be if genotypes were sampled from  $P$  and  $Q$ , rather than from the maximum entropy distribution.

268 From a set perspective, this result translates into two scenarios for the interplay of typical sets at the  
 269 asymptotic limit: [a] if the intersection of the entropy rates lies within the contour of the log-probability  
 270 domain then the two typical sets will have some overlap, whereas [b] if the intersection lies outside the  
 271 contour then the two typical sets will completely separate. Since we assume arbitrarily small  $\varepsilon_P$  and

272  $\varepsilon_Q$ , the set overlap in case [a] only depends on the density of the domain at the intersection of the  
 273 entropy rates, and is approximately given by  $2^{n\overline{H}(R)}$ , where  $R$  is the distribution given by frequencies  $r_i$   
 274 that yields the maximum entropy rate under the constraints that  $\overline{H}(r, p) = \overline{H}(P)$  and  $\overline{H}(r, q) = \overline{H}(Q)$ .

275 To see that there could not be a third scenario in which one typical set is wholly contained in the  
 276 other (except trivially for the hypothetical case where one distribution is uniform, i.e.,  $p_i = \frac{1}{2}$ ), we  
 277 show that the entropy rate cannot coincide with the minimal or maximal bounds of the domain on  
 278 the log-probability space. From a geometric perspective on the log-probability space (see Fig. 5) this  
 279 means that the two entropy rate lines are never tangential to the genotype domain. Formally, with  
 280 respect to the minimum for population  $P$  from Eq. (11), the inequality,

$$\min_P = -\frac{1}{n} \sum_{i=1}^n \log_2 \max\{p_i, 1 - p_i\} \leq \overline{H}_n(P) = -\frac{1}{n} \sum_{i=1}^n \left( p_i \log_2 p_i + (1 - p_i) \log_2 (1 - p_i) \right),$$

281 obtains equality only for  $p_i = 1/2$  for all  $i : 1 \dots n$ , an impossible population scenario (similarly for  
 282  $\max_P, \min_Q$  and  $\max_Q$ ). Fig. 6A depicts these possibilities in the form of Venn diagrams.

## 283 2.2 Source-full mutual typicality

284 We would also like to analyze a modified definition of mutual typicality, which only considers probable  
 285 genotypes, i.e., those likely to originate from their respective populations by a random sampling pro-  
 286 cedure. We also retain the original relevance of the choice of  $\varepsilon_P$  and  $\varepsilon_Q$ , and again focus our inquiry at  
 287 the asymptotic limit. This perspective on mutual typicality is explicitly pertinent for our subsequent  
 288 inquiry into typicality-based classifiers. It is now necessary to introduce the concept of ‘cross entropy  
 289 criterion’, which measures the proximity of the entropy and cross entropy rates. There are two such  
 290 criteria for our two-population framework,

$$C_P = \left| \overline{H}_n(q, p) - \overline{H}_n(P) \right| \quad \text{and} \quad C_Q = \left| \overline{H}_n(p, q) - \overline{H}_n(Q) \right|. \quad (12)$$

291 Clearly, if the two populations are effectively a single population ( $P=Q$ ) then both cross entropy  
 292 criteria will be zero, since from basic definitions,

$$\begin{cases} C_P = \left| \overline{H}_n(q, p) - \overline{H}_n(P) \right| = \left| \overline{D}_n(Q\|P) + \overline{H}_n(Q) - \overline{H}_n(P) \right| = 0 \\ C_Q = \left| \overline{H}_n(p, q) - \overline{H}_n(Q) \right| = \left| \overline{D}_n(P\|Q) + \overline{H}_n(P) - \overline{H}_n(Q) \right| = 0, \end{cases}$$

293 where the KL-Divergence rate from  $P$  to  $Q$  is naturally defined as,

$$\overline{D}_n(P\|Q) = -\frac{1}{n} \sum_{i=1}^n p_i \log_2 \frac{p_i}{q_i} + (1 - p_i) \log_2 \frac{1 - p_i}{1 - q_i}. \quad (13)$$

294 (and similarly from  $Q$  to  $P$ ). However, one cross entropy criterion may be asymptotically zero under  
 295 a standard model for allele frequencies, even given *differing* populations; population clusters are then  
 296 inseparable on the corresponding log-probability plot along the corresponding axis (Appendix B.2).  
 297 Crucially, both criteria cannot asymptotically be zero *at the same time* (Appendix B, Remark B.2.1 ),

$$\max \left( \lim_{n \rightarrow \infty} C_P, \lim_{n \rightarrow \infty} C_Q \right) > 0$$

298 Now, from the AEP and the cross entropy AEP of Eqs. (4) and (5) it follows that the predominant  
 299 asymptotic scenario is exclusive typicality *with probability 1*, given a choice of small typicality  $\varepsilon$ ’s based

300 on the *cross entropy criteria*, such that  $\varepsilon_P \leq C_P$  and  $\varepsilon_Q \leq C_Q$ . Otherwise, in case  $C_P < \varepsilon_P$  or  
 301  $C_Q < \varepsilon_Q$ , then *asymptotically* one typical set will be *with probability 1* fully contained in the other  
 302 (i.e., all samples originating from one population are mutually typical and all samples originating from  
 303 the other population are exclusively typical). These two cases are depicted in Fig. 6, under large  $n$  to  
 304 simulate the asymptotic behavior.

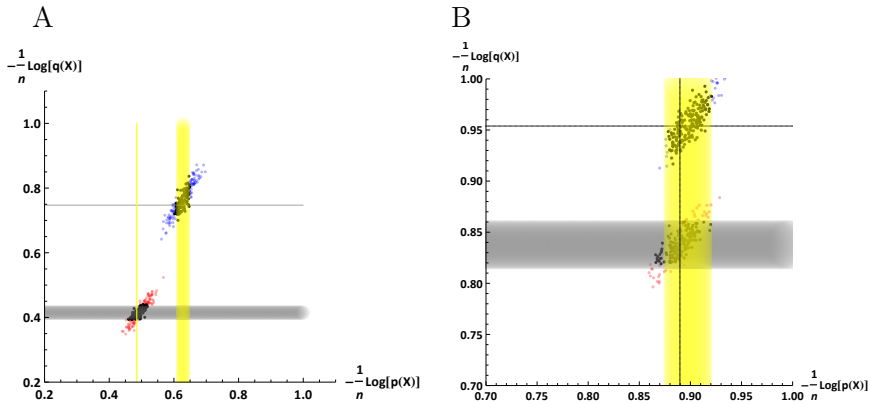

Fig. 6: With samples originating from populations  $P$  and  $Q$ , there is *with probability 1* either exclusivity of typicality (A) or complete one-sided mutual typicality (B). Entropy rates are marked as wide strips according to respective epsilons and cross entropy rates are the thin lines. A: a typical scenario in which there is exclusivity of typicality ( $F_{ST} = 0.02$ ,  $n = 1000$ ,  $\varepsilon_P = \varepsilon_Q = 0.02$ ). | B: a highly uncommon scenario where one *cross entropy criterion* is close to zero although populations are distant ( $F_{ST} = 0.02$ ,  $n = 1600$ ,  $\varepsilon_P = \varepsilon_Q = 0.02$ ), and therefore all samples from  $Q$  are mutually typical but none of  $P$  are as such (a zoomed view to capture the proximity of the entropy rate and cross entropy rate for  $P$ , the latter accentuated as black line).

305 Let  $S_P^m$  and  $S_Q^m$  denote random samples of size  $m$  from population  $P$  and  $Q$  respectively. Define  
 306 the sampled typical sets  $t_P^m$  and  $t_Q^m$  by,

$$t_P^m := T_P \cap (S_P^m \cup S_Q^m)$$

307

$$t_Q^m := T_Q \cap (S_P^m \cup S_Q^m)$$

308 If the sample size  $m$  is not too large, the Venn diagram associated with these two sets is most likely  
 309 equal to one of the two options depicted in Fig. 7B.

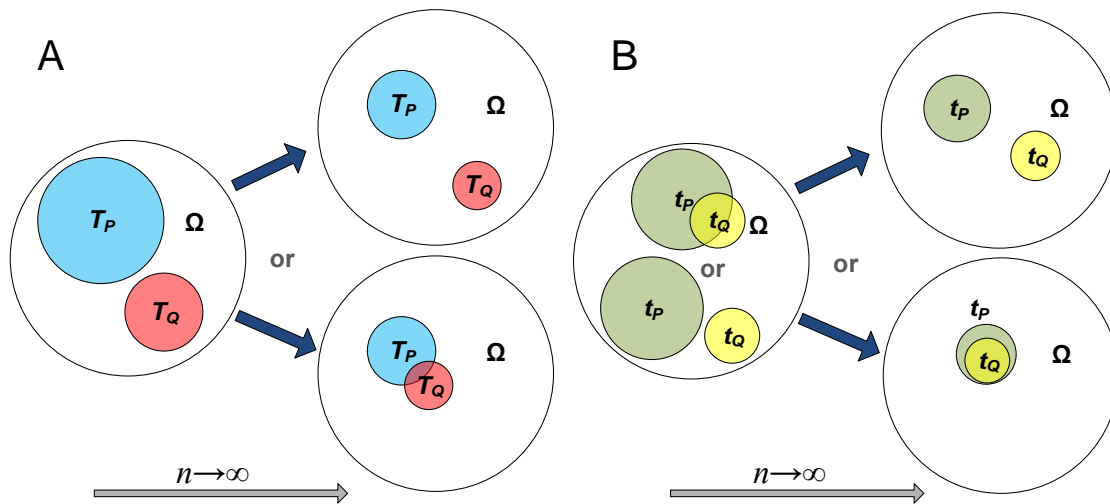

Fig. 7: A Venn diagram of the interplay of two typical sets (denoted  $T_P$  and  $T_Q$ ) with respect to populations  $P$  and  $Q$ , from low  $n$  to an asymptotic limit. A: In the general case where we consider all possible genotypes from the universe, exclusive typicality at low dimensions transforms into either complete separation (bottom) or a very slight overlap (top), depending on the model parameters of the two populations. | B: In the case where genotypes are sampled from their source populations, a possible overlap in low dimensions transforms into either complete separation (top) or, rarely, a case where one typical set is wholly contained in the other (bottom). Note that the size of the typical sets relative to the universe is asymptotically zero, an aspect that cannot be captured in this schematic.

### 310 3 A geometric perspective

311 We can gain more insight into the relation of typical genotypes to non-typical ones by taking a geo-  
 312 metric perspective, where long genotype sequences are seen as vectors in  $n$ -dimensional genotype space  
 313 [Huggins et al., 2007]. Essentially, the genotypes all lie on a subset of the vertices of a hypercube of  
 314 dimension  $n$  (Fig. 8).

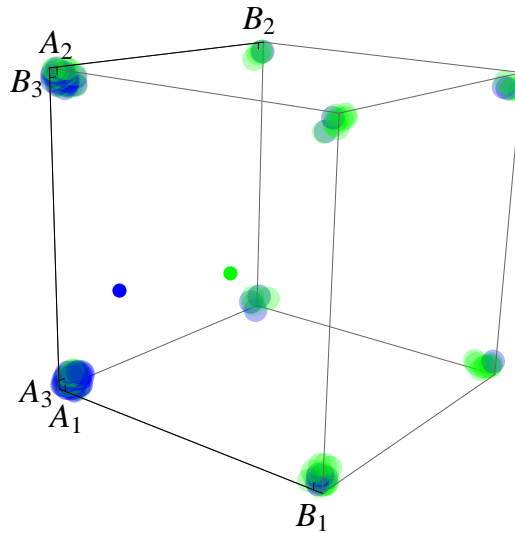

Fig. 8: A geometric representation of the space of 3 SNP genotypes sampled from two populations. Genotype samples lie on the vertices of the (hyper)cube, where  $A_i$  is the “0” allele and  $B_i$  the “1” allele for locus  $i, i : 1 \dots 3$  (e.g., genotype samples on the bottom left vertex  $A_1A_2A_3$  are 000 genotypes). Here 40 samples were drawn from one population (blue) and 40 samples from the other population (green), with respective population centroids represented by smaller dots within the cube.

315 How are the typical genotypes dispersed with respect to hypercube space? From the inequalities  
 316 of Eqs. (10) it is evident that all typical genotypes are represented by those vertices that lie inside  
 317 an  $(n - 1)$ -dimensional hyperplane of width  $2\varepsilon$  intersecting the hypercube at some point, with an  
 318 orientation and location fully determined by the parameters of the population distribution.

319 More importantly, at high dimensions the set of typical genotypes disperses evenly across the space  
 320 occupied by population samples. The evidence for this comes from two types of numerical simulations.  
 321 First, a PCA plots, which are known to essentially retain relative distances in the largest principal  
 322 components, clearly indicate that typical genotypes behave as a random sample from the population,  
 323 as depicted for two different populations in Fig. 9.

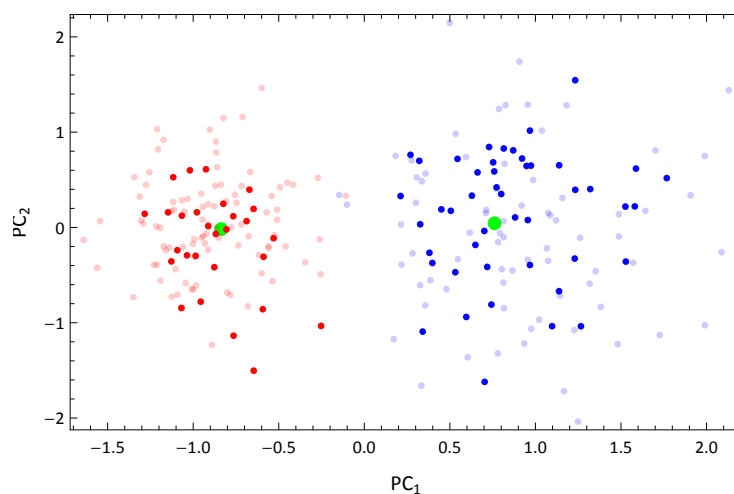

Fig. 9: A PCA plot of two populations, blue and red, with typical genotypes of each in dark blue and dark red respectively (with centroids in green), demonstrating the even dispersion of typical samples in high dimensions. The simulation uses 120 samples of  $n=180$  loci drawn from each population and SNP frequencies modeled on Beta distributions ( $\alpha_P = 4, \beta_P = 20, \alpha_Q = 2, \beta_Q = 20, \varepsilon = 0.01$ ).



324 Second, an analysis of the average pairwise distance of typical genotype pairs compared to that  
325 of the whole distribution, reveals that the former converges to the latter *even when only a small*  
326 *portion of the pairs are typical* (see Appendix B.3 for the asymptotic equidistance property; see  
327 [Granot et al., 2016] for the effect of LD on equidistance). Note that trivially, if the whole sample  
328 becomes typical at some high dimension then the two averages will by definition converge to the same  
329 value. Moreover, simulations at low dimensions reveal that typical genotypes are slightly more densely  
330 clustered than samples from the whole population, since the convergence to the total average distance  
331 is always from below. These results are illustrated in Fig. 10.

332 Not very surprisingly, the higher the population entropy rate the higher the average pairwise  
333 distance, since genotypes will tend to differ across more loci (see Appendix B.3). Finally, the lower the  
334  $\varepsilon$  we choose to define our typical set the lower the rate of convergence: this suggests that genotypes  
335 which are essentially more ‘strongly typical’ (i.e., that correspond to a greater proximity to the entropy  
336 rate) are more tightly clustered.

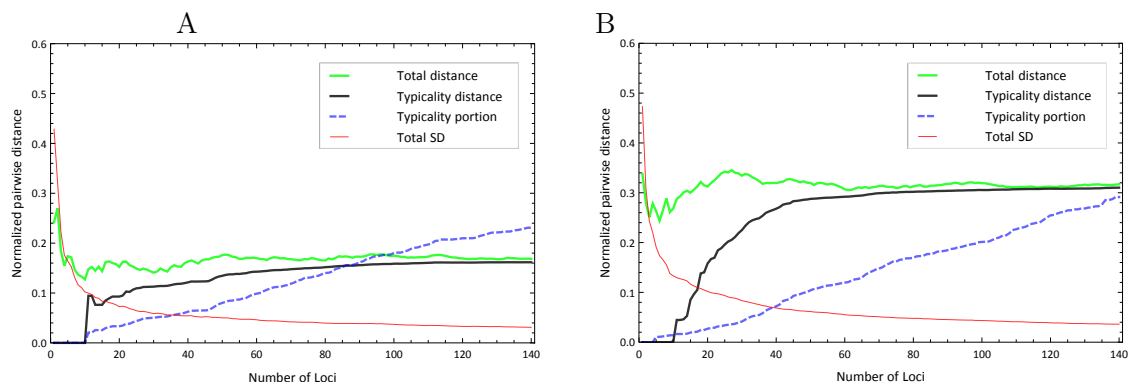

Fig. 10: Two runs of a numerical simulation for average pairwise distance for samples drawn from a single population (in green), compared to a subset which comprises only of pairs of typical genotypes (in black), with  $\varepsilon = 0.01$ . The two curves always converge at high number of loci  $n$  even when only a small portion (in dashed blue) of the pairs are typical. We also convey the variance (thin red) of the pairwise total distance to highlight the asymptotic equidistance property. A: a scenario with population entropy rate = 0.41 (corresponding to very low MAFs) B: entropy rate = 0.73 (corresponding to medium MAFs). Simulated using 120 samples drawn from a populations modeled on Beta distributions for SNP frequencies.

## 337 4 Information-theoretic learning

338 The relation of information theory to statistical learning is currently a very active field of inquiry.  
339 The use of information theoretic learning criteria in advanced learning models such as neural networks  
340 and other adaptive systems have clearly demonstrated a number of advantages that arise due to the in-  
341 creased information content of these criteria relative to second-order statistics ([Erdogmus and Principe, 2006]).  
342 From a machine learning perspective, one of the early insights of information theory was to consider a  
343 classification problem as a noisy channel. Fano’s inequality ([Fano, 1961]), central to information theory,  
344 links the transmission error probability of a noisy communication channel to standard information  
345 theoretic quantities such as conditional entropy and mutual information.

346 We propose taking a further step in this direction, by implementing classifiers for genetic population  
347 data based on the principle and properties of typical sets, making use of our notions of population  
348 entropy rate, cross entropy rate, cross entropy criteria and typical genotypes. We derive our motivation  
349 by the preceding geometrical and mutual typicality analyses. The former perspective indicates that  
350 typical genotypes are asymptotically good representatives of their source populations, while the latter

351 perspective indicates that samples from different populations are asymptotically *exclusively* typical.  
 352 Crucially, we shall see that the performance of typicality-based classifiers is highly dependent on the  
 353 value of the cross entropy criteria, specifically that,

$$\max\{C_P, C_Q\} \gg 0.$$

354 It is also instructive to compare the performance of such information-theoretic classifiers against  
 355 a standard Bayes classifier (or *maximum-likelihood* classifier if no prior is available). This classifier is  
 356 both conceptually simple in its definition, and optimal in its performance under known class-conditional  
 357 densities. The expected error or misclassification rate of the Bayes classifier is called the *Bayes error*  
 358 ([Hastie et al., 2009]). Our standard assumption of linkage equilibrium within populations (absence of  
 359 within-class dependencies) motivates use of a *naïve Bayes* classifier, where class-conditional likelihoods  
 360 are expressed as the product of allele frequencies across the independent loci.

#### 361 4.1 Classifiers based on set-typicality

362 According to the AEP, if a *long* genotype is not typical for population  $P$ , then it is very unlikely  
 363 that the genotype originated from population  $P$ . This suggests that a test of typicality could classify  
 364 genotypes to the two different populations: naively, a genotype is classified to  $P$  if it is typical for  
 365  $P$ , and classified to  $Q$  if it is typical for  $Q$ . However, this naïve formulation of the classifier does not  
 366 specify what should happen in case a genotype is typical to both  $P$  and  $Q$ , or if it is not typical to  
 367 either population. Moreover, the definition of typicality is associated with a parameter  $\varepsilon$ . The choice  
 368 of this parameter is closely related to these issues. Nonetheless, our previous analysis shows us how we  
 369 may deal with these. Fig. 11 depicts a typical instance of the mapping of our population clusters on a  
 370 2D log-probability plot, in relation to the entropy and cross entropy rates, and some  $\varepsilon$  parameters.

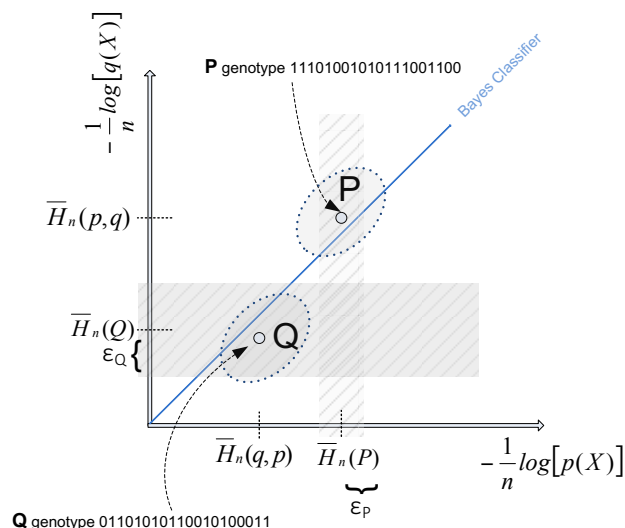

Fig. 11: A typical instance of the location of the two population clusters on a 2D log-probability plot, in relation to the entropy and cross entropy rates, and a Bayes classifier (here  $\bar{H}_n(P) > \bar{H}_n(Q)$ ). The centers of  $P$  and  $Q$  will *always* lie on opposite sides of the Bayes classifier diagonal since the KL-Divergence is always positive when populations differ (in terms of the coordinates of the two cluster centers,  $\bar{H}_n(p, q) > \bar{H}_n(P)$  and  $\bar{H}_n(q, p) > \bar{H}_n(Q)$ ).

371 We now introduce two typicality-based classifiers. To assess the performance of such a classifier,  
 372 we estimate its error rates, which is the probability the classifier makes an error under the following  
 373 process. With probability half, a genotype is sampled from population  $P$ , and with probability half,  
 374 a genotype is sampled from population  $Q$ . Based on this genotype, the classifier guesses whether it

375 originates from population  $P$  or from population  $Q$ . The error rate is the probability that the classifier  
 376 guesses wrong. More precisely

$$E_n = \frac{1}{2}Pr[\text{classify to } P \mid \text{sampled from } Q] + \frac{1}{2}Pr[\text{classify to } Q \mid \text{sampled from } P].$$

## 377 4.2 The naïve typicality classifier

378 The naïve typicality classifier is based on the idea of classification we have described before, that is  
 379 classify to  $P$  (to  $Q$ ) if the genotype is typical for population  $P$  ( $Q$ ). As discussed before, we need to  
 380 decide what the classifier should do when a genotype is typical for both populations. We prescribe  
 381 that in this case of mutual typicality, the genotype will be classified to the population with the lower  
 382 entropy rate, since the lower entropy rate population has higher asymptotic genotype probability,  
 383  $p(x) = 2^{-n\bar{H}_n(X)}$  ([Cover and Thomas, 2006]). The classifier is then described by,

$$\text{Classify to } P \text{ if } \left| -\frac{1}{n} \sum_{i=1}^n \log_2 p(X_i) - \bar{H}_n(P) \right| \leq \varepsilon_P \quad \text{and} \quad \left| -\frac{1}{n} \sum_{i=1}^n \log_2 q(X_i) - \bar{H}_n(Q) \right| > \varepsilon_Q$$

384 or else,

$$\text{Classify to } Q \text{ if } \left| -\frac{1}{n} \sum_{i=1}^n \log_2 q(X_i) - \bar{H}_n(Q) \right| \leq \varepsilon_Q \quad \text{and} \quad \left| -\frac{1}{n} \sum_{i=1}^n \log_2 p(X_i) - \bar{H}_n(P) \right| > \varepsilon_P$$

385 or else, if a genotype is not typical to any population, the classifier assigns by proximity, that is, it  
 386 classifies to  $P$  if

$$\left| -\frac{1}{n} \sum_{i=1}^n \log_2 p(X_i) - \bar{H}_n(P) \right| \leq \left| -\frac{1}{n} \sum_{i=1}^n \log_2 q(X_i) - \bar{H}_n(Q) \right|,$$

387 and otherwise to  $Q$ .

388 Or else, if mutually typical classify to  $P$  if,  $\bar{H}_n(P) < \bar{H}_n(Q)$ , and otherwise to  $Q$ .

389 The choice of  $\varepsilon$  should not be arbitrary and also not necessarily equal between the two populations.  
 390 If we choose  $\varepsilon$  too large we may never have exclusivity (as from some low dimension onwards all  
 391 genotypes may be mutually typical), while if we choose  $\varepsilon$  too small we will not have typicality at lower  
 392 dimensions (low SNP count). A reasonable choice is to base the two  $\varepsilon$ 's on the cross entropy criteria,  
 393 which consequently have to be determined in the learning stage,

$$\varepsilon_P = \frac{1}{2}C_P, \quad \varepsilon_Q = \frac{1}{2}C_Q.$$

394 This represents a balance between avoiding mutual typicality (by setting  $\varepsilon$  not too high) while allowing  
 395 for exclusive typicality (by setting  $\varepsilon$  not too low).

396 Based on the quantitative versions of the AEP and cross entropy AEP, we derive the following  
 397 error bounds for the naïve typicality classifier (Appendix C.2),<sup>2</sup>

$$E_n \leq 3 \exp \left( -\frac{nC_Q^2}{2 \log^2 \frac{\delta}{1-\delta}} \right).$$

398 We note that a classifier which only classifies by proximity to the entropy rates amounts to the  
 399 implicit assumption of equal entropy rates. This may lead to wrong classification of mutually typical  
 400 samples, especially at lower dimensions; e.g., with differing entropy rates and with respect to the log-  
 401 probability space, some samples from the cluster of  $Q$  may lie closer on the  $x$ -axis to  $\bar{H}_n(P)$  than on  
 402 the  $y$ -axis to  $\bar{H}_n(Q)$ , and thus be wrongly classified to  $P$ .

<sup>2</sup>We may also explicitly express the error rate of this classifier in a closed form (Appendix A.1).

### 403 4.3 The cross entropy typicality classifier

404 In fact, our previous analysis of the cross entropy criteria shows that a simpler classifier, for which the  
405 selection of  $\varepsilon$  occurs implicitly and only one sample entropy is measured, would suffice. Without loss  
406 of generality, assume that  $C_Q > C_P$ . Then classify to  $Q$  if the sample entropy with respect to  $Q$  of a  
407 genotype is closer to the entropy rate of  $Q$  than to the cross entropy rate of  $P$  given  $Q$ , i.e.,

$$\left| -\frac{1}{n} \sum_{i=1}^n \log_2 q(X_i) - \bar{H}_n(Q) \right| \leq \left| -\frac{1}{n} \sum_{i=1}^n \log_2 q(X_i) - \bar{H}_n(p, q) \right|$$

408 and classify to  $P$  otherwise.

409 Note that, without loss of generality, for any level of  $C_Q$ , a higher convergence rate for our entropy  
410 and cross entropy AEPs implies that at any dimension  $n$ , samples from  $Q$  will tend to map tighter  
411 around  $\bar{H}_n(Q)$ , while samples from  $P$  will tend to map tighter around  $\bar{H}_n(p, q)$  in the log-probability  
412 space. This immediately leads to stronger separation of the clusters along the  $Q$  axis, and therefore  
413 better classification prospects.

414 The error rate of this classifier can again be estimated from the quantitative AEPs, and is bounded  
415 by,<sup>3</sup>

$$E_n \leq 2 \exp \left( -\frac{nC_Q^2}{2 \log^2 \frac{\delta}{1-\delta}} \right).$$

416 as shown in Appendix C.2.

417 The guiding principle behind this classifier is that the larger cross entropy criterion represents the  
418 empirical entropy dimension along which there is stronger separation between the clusters, a direct  
419 consequence of the AEP theorems of Eqs. (4) and (5). We note here that it is generally not possible  
420 for this classifier to avoid the computation of both  $C_P$  and  $C_Q$ , inferring their relation by examining  
421 some simpler proxy.<sup>4</sup> Indeed, the population entropy rates, which are generally more readily available,  
422 do not contain enough information since, for example,

$$\bar{H}_n(P) > \bar{H}_n(Q) \ \& \ \bar{H}_n(P) > \bar{H}_n(q, p) \Rightarrow C_Q > C_P$$

423 otherwise it is also possible that  $C_Q < C_P$  (Appendix B, Corollary B.2.2).

424 Specifically, if without loss of generality  $C_Q > C_P$  then the classifier considers the empirical entropy  
425 of samples from the two populations with respect to the  $Q$  distribution. For any given level of the  
426 cross entropy criterion (here  $C_Q$ ), a higher convergence rate roughly implies that at any dimension  $n$ ,  
427 samples from  $Q$  will tend to map tighter around  $\bar{H}_n(Q)$ , while samples from  $P$  will tend to map tighter  
428 around  $\bar{H}_n(p, q)$ . The two classifiers are presented schematically in Fig. 12.

---

<sup>3</sup>As with the naïve typicality classifier, we may explicitly express the error rate of this classifier in a closed form (Appendix A.2).

<sup>4</sup>Under a particular *restrictive assumption* on the underlying SNP frequency model and for large enough  $n$ , the classifier may use the entropy rates as proxy, due to the following *asymptotic* result,  $\lim_{n \rightarrow \infty} \bar{H}_n(P) > \lim_{n \rightarrow \infty} \bar{H}_n(Q) \Rightarrow \lim_{n \rightarrow \infty} C_Q > \lim_{n \rightarrow \infty} C_P$  (Appendix B, Corollary B.2.2)

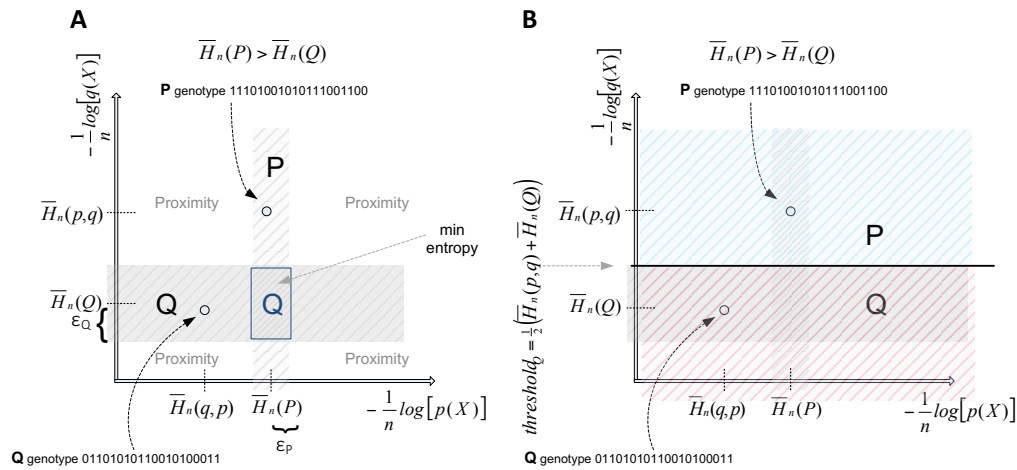

Fig. 12: The naïve typicality classifier works according to exclusive typicality (with classification on min entropy in case of mutual typicality, and proximity to entropy rates in case of non-typicality). B: The simpler cross entropy classifier works by considering only the empirical entropy with respect to one population and classifying according to proximity to entropy rate vs. cross entropy rate.

429 Crucially, we show that given any arbitrary thresholds on SNP frequencies, the error rates are  
 430 exponentially bounded and thus are asymptotically zero, as would be required from any classifier on  
 431 high dimensional data, and the rate of decrease is proportional to the maximal of the two cross entropy  
 432 criteria. A numerical simulation of the log-probability space and the resulting error rates in a scenario  
 433 of differing population entropy rates is depicted in Fig. 13 (real worldwide distant populations often  
 434 have different SNP-based diversities, as reflected by property ‘f’ in section *Properties of sequences of*  
 435 *genetic variants*).

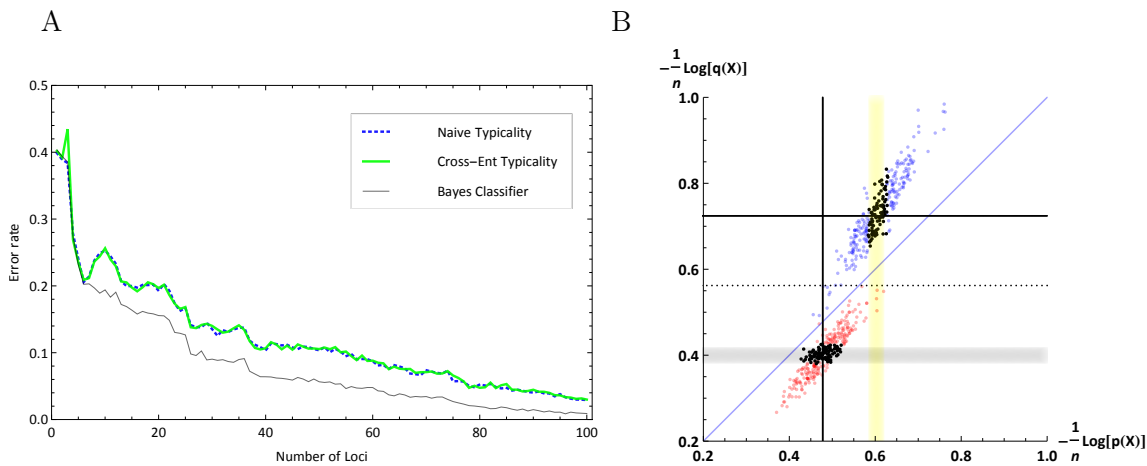

Fig. 13: The performance of the typicality-based classifiers vs. an optimal Bayes classifier when population entropy rates differ (given known underlying allele frequencies). A: The error rates of the typicality classifiers demonstrate a good performance even for close populations. | B: The two clusters on the log-probability plot portray a strong horizontal separation (dotted line represents the cross entropy classification threshold), here at  $n = 300$  SNPs ( $w/600$  samples). In both panels SNP frequencies were modeled on Beta distributions ( $\alpha_P = 4, \beta_P = 20, \alpha_Q = 2, \beta_Q = 20$ ) at each locus, with  $F_{ST} = 0.03, \bar{H}_n(P) = 0.6, \bar{H}_n(Q) = 0.4$ .

436 Further simulations of the typicality classifiers reveal a low performance when the two cross entropy  
 437 criteria are very similar (generally associated with similar population entropy rates, but not necessar-  
 438 ily). A log-probability plot with respect to the cross entropy classifier reveals that this phenomenon is  
 439 due to a relatively weak vertical/horizontal separation of the clusters (Fig. 14).

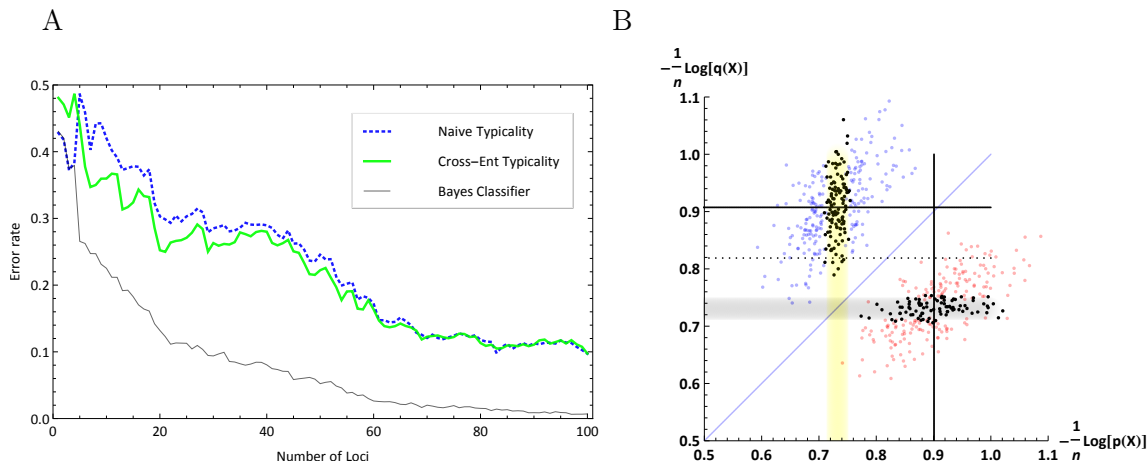

Fig. 14: The performance of the typicality-based classifiers vs. an optimal Bayes classifier when population entropy rates are very *similar* (given known underlying allele frequencies). A: The error rates of the typicality classifiers demonstrate relatively poor performance. | B: The two clusters on the log-probability plot portray a weak horizontal separation (dotted line represents the cross entropy classification threshold) even at  $n = 200$  SNPs ( $w/600$  samples), while maintaining separation with respect to the Bayes classification line (thin blue). In both panels SNP frequencies were modeled on Beta distributions ( $\alpha_P = 2, \beta_P = 6, \alpha_Q = 2, \beta_Q = 6$ ) at each locus, with  $F_{ST} = 0.05, \bar{H}_n(P) = 0.73, \bar{H}_n(Q) = 0.76$ .

#### 440 4.4 Sampling Noise

441 The typicality classification models have been thus far defined parametrically, using the underlying  
 442 frequencies of SNPs across the two populations. In practice, however, estimated frequencies from  
 443 available data, rather than ‘true’ values must be used. This introduces a source of stochastic noise into  
 444 our system. The link of noise to uncertainty was noted very early by [Shannon and Weaver, 1949], who  
 445 stressed that: ‘If noise is introduced, then the received message contains certain distortions . . . [and]  
 446 exhibits, because of the effects of the noise, an increased uncertainty’. Fano’s inequality provides a  
 447 lower bound on the minimum error rate attainable by any classifier on symbols through a noisy channel,  
 448 in terms of entropies and conditional entropies of the source and destination. Suppose that we know  
 449 a random variable  $Y$  and we wish to guess the value of a correlated random variable  $X$ . We expect to  
 450 be able to estimate  $X$  with a low probability of error only if the conditional entropy  $H(X|Y)$  is small.  
 451 Assuming binary symbols as in our genetic framework, a simplified and slightly relaxed quantification  
 452 of this idea is the lower bound on the error,  $e \geq H(X) - I(X; Y) - 1$  ([Cover and Thomas, 2006]).

453 Simulations of a variety of classification methods on genetic data show that performance is degraded  
 454 with smaller population samples, most notably for close populations ([Rosenberg, 2005]). Estimates  
 455 of SNP frequencies computed at the training stage deviate from their true population values due to  
 456 *statistical sampling*, a source of noise different from that introduced by error in the sequencing of ‘test  
 457 samples’. This is the case even when genetic sequencing is 100% error free since it is purely a statistical  
 458 effect.

459 Here we highlight a surprising feature of all typicality based classifiers under such training noise.  
 460 For scenarios of close populations (low  $F_{ST}$ ), differing entropy rates and small training sample sizes,  
 461 the typicality based classifiers consistently out-perform the Bayes classifier when allele frequencies are  
 462 estimated using a natural (naïve) or maximum-likelihood estimator (MLE).<sup>5</sup> Allele frequency estimates  
 463 of zero are replaced with a small constant proportional with the sample size, a common procedure to  
 464 avoid zero genotype frequencies ([Rosenberg, 2005]; [Phillips et al., 2007]). Specifically, for a sample

<sup>5</sup>A natural estimator, which simply counts the proportion of alleles of a particular type, and a maximum likelihood estimator (MLE) give identical solutions when the sample consists of unrelated individuals. Thus maximum likelihood provides a justification for using the “natural” estimator ([Adrianto and Montgomery, 2012]).



465 of size  $m$ , the naïve ML estimator sets frequencies to be  $1/(2m + 1)$  for counts of zero alleles, and  
 466  $1 - 1/(2m + 1)$  for counts of  $m$  alleles (since we assume SNPs have some cut-off frequency), as in  
 467 [Phillips et al., 2007]. The advantage of such an estimator is that it *makes no underlying assumptions*  
 468 on the ‘true’ distributions of the parameters estimated (in particular, it makes no assumption on SNP  
 469 frequencies being distributed i.i.d. across loci), i.e., no prior is utilized.<sup>6</sup> We may also incorporate  
 470 a Bayesian approach to allele frequency estimation by using a prior based on some justified model,  
 471 effectively attenuating the sampling noise. A reasonable prior (close-to-optimal) can be produced by  
 472 updating a histogram across a large number of loci, given the *assumption* of identically distributed  
 473 frequencies across loci. In conjunction with the binomial likelihood function this results in a posterior  
 474 distribution.<sup>7</sup> These phenomena are illustrated in Fig. 15.

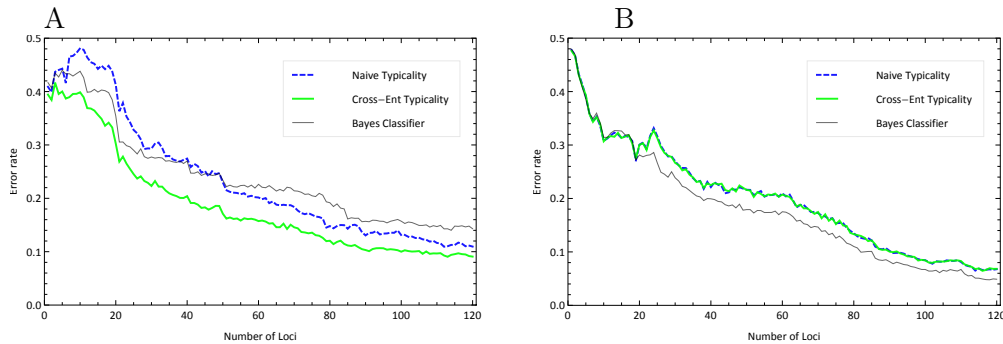

Fig. 15: With maximum likelihood estimation of allele frequencies under small training sets (high sampling ‘noise’ level) and differing population entropy rates the typicality based classifiers consistently out-perform a Bayes classifier (Panel A), an advantage which dissipates if the ‘true’ prior is known and a Bayesian posterior is employed (Panel B). In both panels SNP frequencies were modeled on Beta distributions ( $\alpha_P = 4/\beta_P = 20$ ,  $\alpha_Q = 2/\beta_Q = 20$ ) at each locus, with  $F_{ST} = 0.03$ ,  $\overline{H}_n(P) = 0.6$ ,  $\overline{H}_n(Q) = 0.4$ , with a training set of 9 samples from each population, averaged over 6 training runs.

475 What is the underlying reason for the typicality classifiers’ resilience to training noise under a naïve  
 476 maximum likelihood estimation of allele frequencies? From AEP considerations, the noisy samples from  
 477 population  $P$  will cluster in the log-probability space around the coordinate  $(\hat{H}_n(p, \hat{p}), \hat{H}_n(p, \hat{q}))$ , while  
 478 the noisy samples from  $Q$  cluster around the coordinate  $(\hat{H}_n(q, \hat{p}), \hat{H}_n(q, \hat{q}))$ , where  $\hat{p}$  denotes the vector  
 479 of length  $n$  such that  $\hat{p}_i$  is the maximum-likelihood estimate of  $p_i$ , and a similarly for  $\hat{q}$ . Simulations  
 480 indicate that the introduction of sampling noise causes the population clusters to disperse, and more  
 481 importantly, to shift towards the diagonal Bayesian separation line and therefore compromise the Bayes  
 482 classifier’s accuracy (as can be appreciated from comparing the two panels of Fig. 16). Formally, from  
 483 Jensen’s inequality we get,

$$\begin{cases} \mathbb{E}_{T_N}[\overline{H}_n(p, \hat{p}) - \overline{H}_n(P)] > 0, \\ \mathbb{E}_{T_N}[\overline{H}_n(q, \hat{q}) - \overline{H}_n(Q)] > 0, \end{cases}$$

484 where  $E_{T_N}$  denotes the expectation value with regard to a training scenario of sample size  $N$ .

485 We now turn to the resilience of the typicality classifiers and consider the effect of noise on the  
 486 cross entropy classifier, where without loss of generality,  $C_Q > C_P$ . Note that,

$$\lim_{n \rightarrow \infty} \mathbb{E}_{T_N}[\overline{H}_n(\hat{p}, \hat{q}) - \hat{H}_n(p, \hat{q})] = 0,$$

<sup>6</sup>The performance of the typicality classifiers under MLE can also be formally captured (Appendix A.3).

<sup>7</sup>The standard approach is to take the mean of the posterior distribution. The beta distribution is a conjugate prior for the binomial likelihood (which is our sampling distribution) since the posterior is also a beta distribution, making the formulation of the posterior simple:  $Beta(z + \alpha, N - z + \beta)$ , where  $Beta(\alpha, \beta)$  is the prior,  $N$  is the size of the sample and  $z$  is the number of ‘1’ alleles in the sample at that locus [Schervish, 1995]. We then take the mean of the posterior which is  $(z + \alpha)/(N + \alpha + \beta)$ .

487 since  $\hat{p}$  is an unbiased estimator of  $p$ . Note that because both  $p_i$  and  $q_i$  are distributed i.i.d., it holds  
 488 for all  $i : 1, \dots, n$  that

$$\mathbb{E}_{T_N}[\overline{H}_n(p, \hat{q}) - \hat{H}_n(p, q)] = \mathbb{E} \left[ -p_i \log_2 \frac{\hat{q}_i}{q_i} - (1 - p_i) \log_2 \frac{1 - \hat{q}_i}{1 - q_i} \right].$$

489 Heuristically, this difference is likely to be much larger than the difference

$$\mathbb{E}_{T_N}[\overline{H}_n(q, \hat{q}) - \hat{H}_n(Q)] = \mathbb{E} \left[ -q_i \log_2 \frac{\hat{q}_i}{q_i} - (1 - q_i) \log_2 \frac{1 - \hat{q}_i}{1 - q_i} \right]$$

490 for the following reason: in both cases a large contribution to the difference comes from where  $q_i$  is  
 491 small and  $\hat{q}_i$  provides an underestimate for  $q_i$ , resulting in a large logarithm  $\log_2 \frac{\hat{q}_i}{q_i}$ . However, in the  
 492 second difference, this logarithm has a prefactor  $q_i$  which is small, whereas in the first difference the  
 493 prefactor  $p_i$  which on average is significantly larger.

494 A similar type of argument suggests that the difference  $E_{T_N}[\overline{H}_n(\hat{Q}) - \overline{H}_n(Q)]$  is relatively small  
 495 compared to  $\mathbb{E}_{T_N}[\overline{H}_n(\hat{p}, \hat{q}) - \overline{H}_n(p, q)]$ . These heuristics make plausible that the threshold of the cross  
 496 entropy classifier, calculated as the average of  $\overline{H}_n(\hat{Q})$  and  $\overline{H}_n(\hat{p}, \hat{q})$ , still separates well the ‘noisy’  
 497 clusters, for which the vertical coordinates are given by  $H_n(p, \hat{q})$  and  $H_n(q, \hat{q})$ .

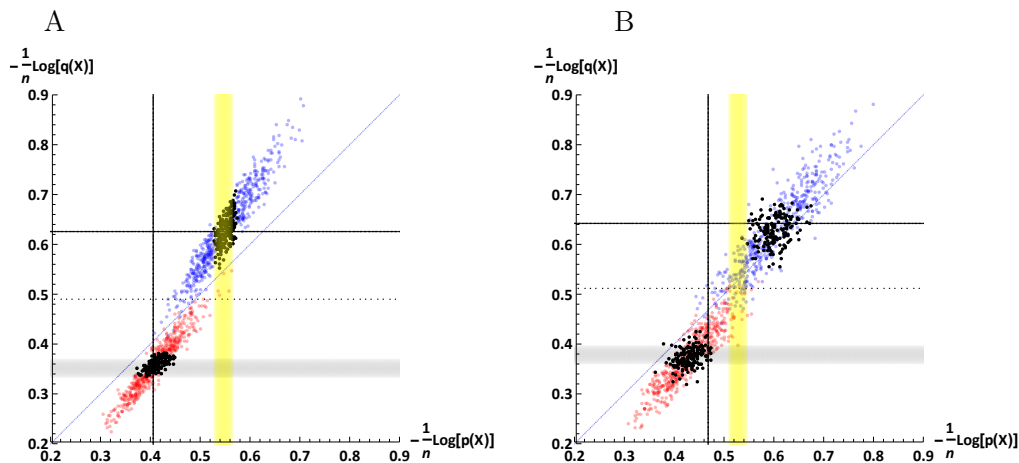

Fig. 16: The effect of training noise on genotype samples on the log-probability plot. A: a scenario without sampling noise. | B: the same scenario when sampling noise is introduced (only 12 training samples from each population), resulting in better horizontal separation (cross entropy classifier) than a diagonal one (Bayes classifier). 1200 samples were drawn from each population at  $n = 300$  SNPs, where population SNP frequencies were modeled on Beta distributions for  $P$  and  $Q$  with  $\alpha_P = 6/\beta_P = 40$ ,  $\alpha_Q = 3/\beta_Q = 40$ , at each locus.

## 498 4.5 Relative-entropy typicality

499 A well-known extension of the concept of typical-set is the ‘relative entropy typical set’ ([Cover and Thomas, 2006],  
 500 Section 11.8). For any fixed  $n$  and  $\varepsilon > 0$ , and two distributions  $P_1$  and  $P_2$ , the relative entropy typical  
 501 set  $A_\varepsilon^{(n)}(P_1||P_2)$  entails all sequences of length  $n$  such that,

$$D(P_1||P_2) - \varepsilon \leq \frac{1}{n} \log_2 \frac{P_1(x_1, \dots, x_n)}{P_2(x_1, \dots, x_n)} \leq D(P_1||P_2) + \varepsilon.$$

502 Similar to standard set typicality, the relative entropy typical set asymptotically includes all the  
 503 probability,

$$\lim_{n \rightarrow \infty} P_1(A_\varepsilon^{(n)}(P_1||P_2)) = 1.$$

504 Crucially for our purposes there exists an associated AEP theorem for relative typicality ([Cover and Thomas, 2006]  
 505 Theorem 11.8.1): Let  $X_1, X_2, \dots, X_n$  be a sequence of random variables drawn i.i.d. according to  $P_1(x)$   
 506 and let  $P_2(x)$  be any other distribution on the same support, then,

$$\frac{1}{n} \log_2 \frac{P_1(x_1, \dots, x_n)}{P_2(x_1, \dots, x_n)} \rightarrow D(P_1 \| P_2) \text{ in probability.}$$

507 However, to account for the non-stationary sources (i.e. the variation of SNP frequencies across loci,  
 508 a standard feature of population data), as in our treatment of entropy typicality, we need to modify  
 509 the definition of relative-entropy typicality and derive an associated AEP theorem (Appendix B.4).

510 We may now construct a naïve classifier based on exclusive relative-typicality, with some choice  
 511 of an epsilon margin around the respective KL-Divergence rate, and some means of resolution for the  
 512 cases of mutual relative-typicality or lack of relative-typicality. Alternatively, a more straightforward  
 513 construction is to simply to classify by proximity to the respective KL-Divergences,

$$\text{Classify to } P \text{ if } \left| \frac{1}{n} \sum_{i=1}^n \log_2 \frac{p(X_i)}{q(X_i)} - \bar{D}_n(P \| Q) \right| < \left| \frac{1}{n} \sum_{i=1}^n \log_2 \frac{q(X_i)}{p(X_i)} - \bar{D}_n(Q \| P) \right|$$

else, classify to  $Q$ .

514 Where the KL-Divergence rate is defined in Eq. (13). Fig. 17 is a schematic of such classifiers  
 515 with respect to the log-probability space. (see Appendix A.4 for a closed-form formulation of the error  
 516 rate).

517 Finally, note that this classifier can also be described as,

$$\text{Classify to } P \text{ if } \sum_{i=1}^n \log_2 \frac{p(X_i)}{q(X_i)} > \frac{n}{2} \left( \bar{D}_n(P \| Q) - \bar{D}_n(Q \| P) \right)$$

else, classify to  $Q$ .

518 While on the other hand, a Bayes classifier with prior  $\alpha$  classifies as follows,

$$\text{Classify to } P \text{ if } \sum_{i=1}^n \log_2 \frac{p(X_i)}{q(X_i)} > \log_2 \frac{1 - \alpha}{\alpha}$$

else, classify to  $Q$ .

519 Hence, the relative entropy classifier that classifies by proximity, as described above, is exactly a Bayes  
 520 classifier with prior  $\alpha$ , where  $\alpha$  satisfies,

$$\log_2 \frac{1 - \alpha}{\alpha} = \frac{n}{2} \left( \bar{D}_n(P \| Q) - \bar{D}_n(Q \| P) \right)$$

521 that is,

$$\alpha = \left( 1 + 2^{\frac{n}{2} \left( \bar{D}_n(P \| Q) - \bar{D}_n(Q \| P) \right)} \right)^{-1}$$

522 where different choices of ‘ $\varepsilon$ ’ would correspond to choosing different priors for the Bayes classifier. Not  
 523 surprisingly, the relative-entropy classifier is similarly not resilient to learning-based noise.

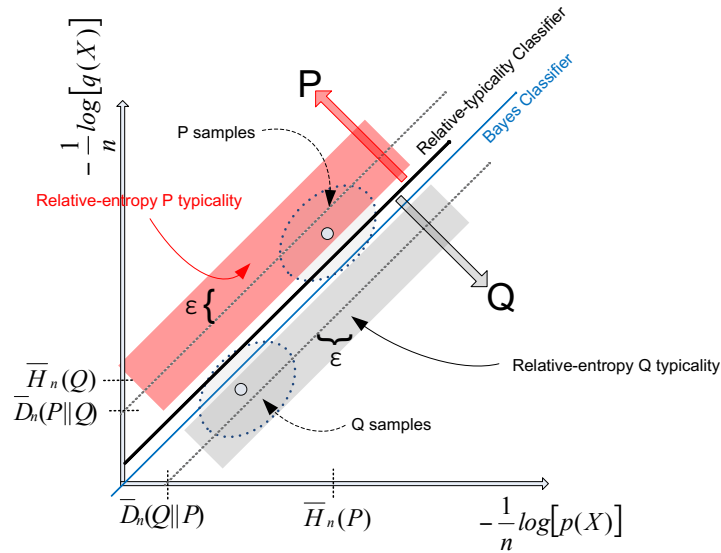

Fig. 17: A schematic representation of a straightforward implementation of a proximity-based relative entropy typicality classifier (black diagonal line) and a naïve relative-entropy classifier (dotted diagonal lines), with respect to some arbitrary epsilon (dark stripe margins, red for  $P$  and grey for  $Q$ ). The proximity-based relative entropy classifier merges in performance with a Bayes classifier with an uninformative class prior (blue) line only when  $\bar{D}_n(P||Q) = \bar{D}_n(Q||P)$ , and is represented by the line  $y = x - (\bar{D}_n(Q||P) - \bar{D}_n(P||Q))/2$ .

## 524 5 Discussion

525 Simplicity is the final achievement.

526 -- F. Chopin.

527 The availability of high-throughput SNP genotyping and the nature of polymorphisms across loci  
528 and diverse populations suggest a fruitful application of one of the core ideas in information theory,  
529 that of set-typicality and its associated properties. In this treatment, we have employed conceptual  
530 and formal arguments along with evidence from numerical simulations to demonstrate that long se-  
531 quences of genotype samples reveal properties that are strongly suggestive of *typical sequences*. This  
532 allowed us to produce versions of the asymptotic equipartition property that comply with population  
533 genetic data and consequently define the notion of mutual typicality and describe information-theoretic  
534 classification schemes. We do not claim here priority in invoking the concept of typical sets broadly in  
535 biology. In examining the fitness value of information, [Donaldson-Matasci et al., 2010] have made use  
536 of the asymptotic properties of typical sequences to capture properties of typical *temporal* sequences  
537 of selection environments and their payoffs in evolution. However, our use of a typical-set framework  
538 to analyze long *sequences of genetic variants* is, as far as we know, original. Moreover, to the best  
539 of our knowledge, a general analysis of mutual and exclusive typicality and the interplay of multiple  
540 typical sets (from sources defined on the same space) is another original contribution. In this context,  
541 we note that the related notion of ‘strong typicality’ is only applicable for stationary sources where the  
542 sample frequency of a symbol is closely linked to its underlying distribution, and therefore not directly  
543 applicable in our framework, where alleles are not identically distributed across loci.

544 The consideration of noise as a source of classification error, and a subsequent quantification, is of  
545 course, not new. From a machine learning perspective, one of the early insights of information theory  
546 was to consider a classification problem as a noisy channel. Fano’s inequality provides a lower bound  
547 on the minimum error rate attainable by any classifier on symbols through a noisy channel, in terms  
548 of entropies and conditional entropies of the source and destination. Suppose that we know a random  
549 variable  $Y$  and we wish to guess the value of a correlated random variable  $X$ . We expect to be able to  
550 estimate  $X$  with a low probability of error only if the conditional entropy  $H(X|Y)$  is small. Assuming  
551 binary symbols as in our genetic framework, a simplified and slightly relaxed quantification of this idea  
552 is the lower bound on the error ([Cover and Thomas, 2006]),  $H(e) + e \cdot \log(\chi) \geq H(X) - I(X; Y)$ .

553 Shannon (1956) has famously cautioned against jumping on ‘the bandwagon’ of information theory  
554 whose basic results were ‘aimed in very specific direction ... that is not necessarily relevant to such  
555 fields as psychology, economics, and other social sciences’. He stressed that while ‘Applications [of  
556 information theory] are being made to biology ... , A thorough understanding of the mathematical  
557 foundation and of its communication application is surely a prerequisite to other applications ...’,  
558 finally concluding that, ‘I personally believe that many of the concepts of information theory will  
559 prove useful in these other fields – and, indeed, some results are already quite promising – but the  
560 establishing of such applications is not a trivial matter of translating words to a new domain, but  
561 rather the slow tedious process of hypothesis and experimental verification.’

562 Notwithstanding Shannon’s concerns, there have been numerous attempts at borrowing both in-  
563 formational concepts and technical results from information theory in the biosciences. In a recent  
564 illuminating review, [Vinga, 2014] highlights several information-theoretic measures that have been  
565 applied widely, e.g., to compare sequences in an alignment-free context, provide block-entropy and  
566 complexity estimation, and assess DNA sequence compression limits. [Ulanowicz et al., 2009] has ush-  
567 ered in the “return of information theory” by using conditional entropy to quantify sustainability and  
568 biodiversity. [McCowan et al., 2002] had emphasized the prominent role of noise in “constraining the

569 amount of information exchanged between signallers and perceivers” in ecological and social contexts  
570 and for signal design and use. By applying quantitative and comparative information-theoretic mea-  
571 sures on animal communication, they hoped to provide insights into the organization and function of  
572 “signal repertoires”. Similarly, [Levchenko and Nemenman, 2014] have shown how cellular noise could  
573 be quantified using mutual information, and the implications of measuring such noise in bits. Even  
574 more recently, [Lan and Tu, 2016] have focused on the “inherent noise in biological systems” which they  
575 have argued can be analyzed by ‘using powerful tools and concepts from information theory such as  
576 mutual information, channel capacity, and the maximum entropy hypothesis’, with subsequent anal-  
577 ysis mostly restricted to entropy and mutual information in their capacity as statistical measures.  
578 Other authors have made claims, admittedly of a conjectural nature, on the relevancy of information  
579 theoretic results to principles of evolution and genetic inheritance. For instance, [Battail, 2013] has  
580 claimed that the trend of biological evolution towards increasing complexity and hereditary principles  
581 requires the implementation of error correcting information-theoretic codes, which are inevitable and  
582 ‘logically necessary’ once it is clear that ‘heredity is a communication process’, while at the same time  
583 emphasizing that these are ‘merely speculations’.

584 While some of these and other approaches have been interesting and insightful, the conceptual and  
585 formal link to information theory mainly comprises of metaphoric use of otherwise technical informa-  
586 tion theoretic concepts and terms, such as communication channel and noise, or the employment of  
587 quantitative measures of variation and dependency that originate in information theory. Indeed, in a  
588 review of the contribution of information theory to molecular biology, [Fabris, 2009] concludes that the  
589 evidence indicates the contribution is “no more than [on] a purely syntactic level” and wherever use  
590 of a statistical framework is required, then “tools such as mutual information, entropy and informa-  
591 tional divergence, can be used with profit”. The author further conjectures that this is due to a naive  
592 “assumption of a substantial equivalence between the Shannon unidirectional transmission system and  
593 the DNA-to-protein communication system.”

## 594 5.1 Channel capacity

595 The concept of *channel capacity*, which also plays a central role in communication theory, may serve  
596 to further highlight the shared properties identified here between long sequences of symbols generated  
597 by a random source and communicated across a noisy channel, and long genotypes originating from a  
598 natural population. The channel capacity is the tight upper bound on the rate at which information  
599 can be reliably transmitted over a noisy communications channel. The usefulness of this notion in other  
600 domains was famously identified by [Kelly, 1956]. Kelly analyzed a scenario which seems to possess  
601 the essential features of a communication problem: a gambler that utilizes the received symbols of a  
602 noisy communication channel in order to make profitable bets on the transmitted symbols. Kelly then  
603 demonstrated that, just as information can be transmitted over a noisy communication channel at or  
604 near Shannon’s channel capacity with negligible error, so can this gambler compound his net worth at  
605 a maximum rate with virtually no risk of ‘total loss’, equal to the mutual information of the source and  
606 receiver (by apportioning his betting amount precisely according to the noise level for each symbol).

607 More formally, the “information” channel capacity  $C$  of a discrete memoryless channel with respect  
608 to sources  $X$  with alphabets supported on  $\chi$  and consequent outputs  $Y$  with alphabets supported on  
609  $y$ , is an inherent property of the channel such that,  $C = \max_{P(X)} I(X; Y)$ , or for nonstationary sources  
610 representing our population model,

$$C = \liminf \max_{P(X_1), P(X_2), \dots} \sum_{i=1}^n \frac{1}{n} I(X_i; Y_i)$$

611 where the maximum is taken over all possible distributions  $P(X_i)$  of the source ([Verdu and Han, 1994]).



612 The capacity is commonly interpreted as the highest rate in bits per channel use at which information  
613 can be sent with arbitrarily low probability of error. Shannon’s channel coding theorem then relates the  
614 maximum information rate possible across the channel with its capacity ([Cover and Thomas, 2006],  
615 Ch.7).

616 We now propose an analogy between the effect of communication noise on channel capacity and the  
617 effect of sampling noise on classification accuracy, centered on the mutual information between inputs  
618 and outputs. If we interpret  $X$  as a random variable representing the  $n$ -SNP genotype from the pooled  
619 source populations and  $Y$  as a random variable representing its source population, then the mutual  
620 information  $I(X; Y)$  captures the *informativeness* of the set of  $n$  markers for population assignment  
621 (see [Tal, 2012a], [Tal, 2012b] for the multilocus formulation). This is also known as the *Infomax*  
622 *principle* in feature selection, where a subset of features is chosen so that the mutual information of  
623 the class label given the feature vector is maximized ([Rosenberg et al., 2003]; [Zhao et al., 2013]; see  
624 [Peng et al., 2005] for the *Max-Dependency* principle). If we now take the *informativeness*  $I(X; Y)$   
625 to represent the *maximal information extractable* across all possible classifiers, a workable analogy  
626 with communication-based channel capacity, which is also expressed in terms of mutual information,  
627 becomes evident. Under this interpretation, the *inferential channel capacity* is achievable by the optimal  
628 Bayes classifier, under known distribution parameters ([Hastie et al., 2009]), i.e., in the absence of  
629 sampling noise; otherwise, given any finite sample size at the learning stage, there may be no single  
630 classification scheme that obtains maximal performance under all data scenarios. Indeed, the lack of a  
631 universally best model for classification is sometimes called the *no free lunch theorem*, which broadly  
632 implies that one needs to develop different types of models for different data, since a set of assumptions  
633 that works well in one domain may work poorly in another ([Murphy, 2012]).

## 634 5.2 Dimensionality reduction

635 It is worthwhile highlighting an additional feature of our log-probability space, with possible pragmatic  
636 use. The mapping of genotype samples to the log-probability space shares some core features with  
637 standard dimensionality reduction schemes such as PCA, which are often deployed for visualization  
638 purposes or as pre-processing in the context of unsupervised learning. Most prominently, [a] the effect of  
639 higher dimensionality (larger  $n$ ) on cluster separability, [b] the effect of population differentiation ( $F_{ST}$ )  
640 on cluster proximity, [c] the effect of distribution entropy rates on the cluster shape, and [d] the general  
641 effect of a possible presence of LD given the explicit (implicit, in the case of PCA) assumption of LE.  
642 At the same time, the log-probability perspective provides information with respect to a supervised  
643 learning framework, most prominently by revealing the effect of noise in the training stage on the  
644 clusters of ‘test samples’, and on the estimated quantities employed by an information-theoretic oriented  
645 classifier, such as our cross entropy typicality classifier.

## 646 5.3 Linkage Disequilibrium

647 When populations have some internal structure (deviation from panmixia) then loci are in linkage  
648 disequilibrium (LD). In terms of the communication framework, LD is analogous to time-dependency  
649 of symbols generated by the source, such that the channel is no longer *memoryless*. How will our  
650 results fare when such dependencies are introduced into the inferential framework?

651 Previous work on analogies and implementations of information theoretic concepts has highlighted  
652 this difficulty. For instance, in his famous approach to betting strategies from an information-rate  
653 perspective, [Kelly, 1956] has also emphasized that in the presence of time-dependency of symbols the  
654 results he obtained may no longer be relevant, acknowledging that ‘theorems remain to be proved’ if

655 the symbol transmission entails dependency on time or past events.

656 Since our results are intrinsically based on AEP theorems, we would be interested to pursue  
657 some generalization of the AEP for (nonstationary) sources with *dependent* symbols. The Shannon-  
658 McMillan-Breiman theorem ([Cover and Thomas, 2006]) is an extension of Shannon’s original AEP  
659 for discrete i.i.d. sources, and holds for discrete-time finite-valued *stationary ergodic sources*, which in  
660 general have dependent symbols. However, the closest to general nonstationary sources with depen-  
661 dent symbols for which an AEP holds are a class of nonstationary sources called ‘asymptotically mean  
662 stationary’ or AMS sources ([Gray, 2011]). These are sources which might not be stationary, but are  
663 related to stationary sources in a specific way. Such sources are equivalent to sources for which relative  
664 frequencies converge and bounded sample averages converge with probability one, but not necessarily  
665 to simple expectations with respect to the source distributions. They include, for example, sources  
666 with initial conditions that die out (asymptotically stationary sources) along with sources that are  
667 block-stationary, e.g., extensions of the source are stationary.

668 Crucially for our purposes, general patterns of LD found in population SNP data should not be  
669 expected to conform to the specific properties characteristic of AMS sources, and therefore we cannot  
670 expect an AEP to hold for such data. Nevertheless, we would like to see whether a ‘naïve’ approach to  
671 classification by typicality, akin to that taken by the naïve Bayes, might still be productive. Adopting  
672 such ‘naïve’ approach means that we employ the same expressions for genotype probabilities, empirical  
673 entropies, population entropy and cross entropy rates, which had all assumed statistical independence.<sup>8</sup>

674 Numerical analysis shows that with various patterns of LD the typicality classifiers do not account  
675 well for its presence, contrary to the naïve Bayes classifier. Under any type of LD, clusters on the  
676 2D log-probability plot tend to substantially disperse (elongating diagonally), breaching the typicality  
677 threshold even for very large  $n$  where we would expect substantial separation (Fig. 18). Interestingly,  
678 this diagonal elongation gives a new perspective on the well-known phenomenon by which under LD  
679 naïve Bayes classifiers still outperform far more sophisticated alternatives, and make it surprisingly  
680 useful in practice even in the face of such dependencies ([Hastie et al., 2009] section 6.6.3). We stress  
681 here that the increased dispersion of samples when LD is introduced *cannot* be taken as indicative of  
682 the well-known result that there is no AEP for nonstationary sources with dependent symbols, since  
683 samples are mapped to this space according to ‘naïve’ independence assumptions. Estimating the  
684 actual genotype probabilities (along with *joint* entropies and cross-entropies under these assumptions  
685 for constructing the typicality classifier) is beyond the scope of the models used in these simulations.

---

<sup>8</sup>Otherwise, we would have to incorporate the full information from the *joint* distribution of SNPs across loci, which is over and above the low-dimensional standard LD statistics.

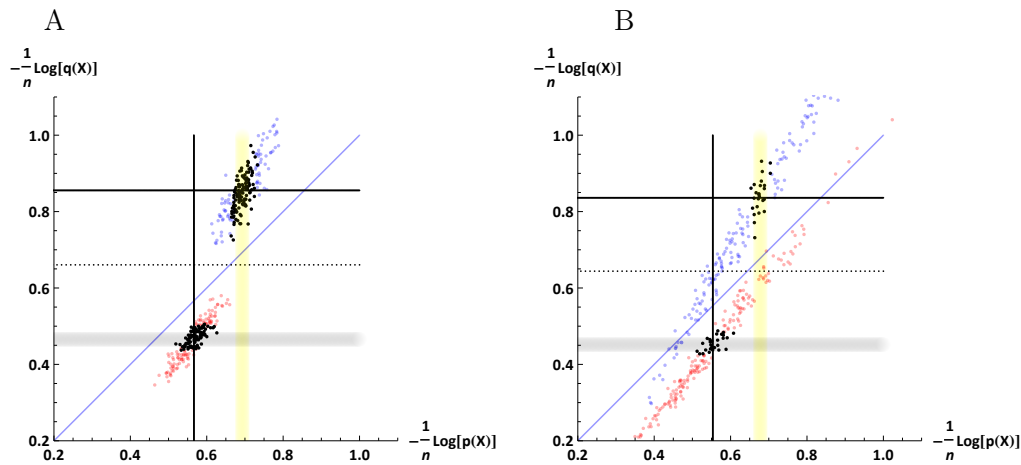

Fig. 18: Clusters of genotype samples from the two populations are elongated diagonally as a function of the amount of LD and its nature, substantially breaching the typicality classification threshold (dotted line) while maintaining separation with respect to the Bayes classification line (thin blue). Here 400 samples were drawn from two populations modeled under Beta distributions with  $n = 600$  SNPs,  $F_{ST} = 0.04$ , with differing population entropy rates, with  $\epsilon = 0.02$  for typicality. A: No LD. | B: Moderate levels of LD.

## 686 6 Conclusion

687 There has recently been revived interest in employing various aspects of information theory for char-  
688 acterizing manifestations of information in biology. Arguably, quantitative analysis of biological infor-  
689 mation has thus far only superficially drawn from the ground-breaking ideas and formal results of this  
690 highly influential theory. Here, we have ventured beyond the mere utilization of information-theoretic  
691 measures such as entropy or mutual information, to demonstrate deep links between a core notion of  
692 information theory, along with its properties and related theorems, and intrinsic features of population  
693 genetic data. We have demonstrated that genotypes consisting of long stretches of variants sampled  
694 from different populations may be captured as *typical sequences* of nonstationary symbol sources that  
695 have distributions associated with population properties. This perspective has enabled us to treat  
696 typical genotypes as proxies for diverse source populations, analyse their properties in high dimensions  
697 and consequently develop an information theoretic application for the problem of ancestry inference.  
698 We hope that this work will open the door for further inquiry into the prospects of rigorous implemen-  
699 tation of both ideas and technical results from information theory in the field of population genetics  
700 and biology in general.

701 The Mathematica code for generating the numerical simulations for the figures can be made avail-  
702 able by request from the corresponding author.

703 **Acknowledgements:** We would like to thank Jürgen Jost for his interest and constructive feedback on these ideas.  
704 We appreciate the input of Robert M. Gray on AMS sources. Special thanks also to Slava Matveev, Guido Montúfar  
705 and Michael Lachmann for some fruitful technical discussions. Finally, we acknowledge the Max Planck Institute for  
706 Mathematics in the Sciences for the platform to present these ideas in an internal seminar and for its generous support.

## 707 References

- 708 [Adrianto and Montgomery, 2012] Adrianto, I. and Montgomery, C. (2012). *Estimating Allele Fre-*  
709 *quencies*, pages 59–76. Humana Press, Totowa, NJ.
- 710 [Battail, 2013] Battail, G. (2013). Biology needs information theory. *Biosemiotics*, 6(1):77–103.
- 711 [Consortium, 2005] Consortium, T. I. H. (2005). A haplotype map of the human genome. *Nature*,  
712 437(7063):1299–1320.
- 713 [Cover and Thomas, 2006] Cover, T. and Thomas, J. (2006). *Elements of Information Theory*. Wiley-  
714 Interscience [John Wiley & Sons], Hoboken, NJ, second edition.
- 715 [Donaldson-Matasci et al., 2010] Donaldson-Matasci, M. C., Bergstrom, C. T., and Lachmann, M.  
716 (2010). The fitness value of information. *Oikos (Copenhagen, Denmark)*, 119(2):219–230.
- 717 [Erdogmus and Principe, 2006] Erdogmus, D. and Principe, J. C. (2006). From linear adaptive filtering  
718 to nonlinear information processing - the design and analysis of information processing systems.  
719 *IEEE Signal Processing Magazine*, 23(6):14–33.
- 720 [Fabris, 2009] Fabris, F. (2009). Shannon information theory and molecular biology. *Journal of Inter-*  
721 *disciplinary Mathematics*, 12(1):41–87.
- 722 [Fano, 1961] Fano, R. M. (1961). *Transmission of information: A statistical theory of communications*.  
723 The M.I.T. Press, Cambridge, Mass.; John Wiley & Sons, Inc., New York-London.
- 724 [Granot et al., 2016] Granot, Y., Tal, O., Rosset, S., and Skorecki, K. (2016). On the apportionment  
725 of population structure. *PLoS ONE*, 11(8):1–24.
- 726 [Gray, 2011] Gray, R. M. (2011). *Entropy and information theory*. Springer, New York, second edition.
- 727 [Hastie et al., 2009] Hastie, T., Tibshirani, R., and Friedman, J. (2009). *The elements of statistical*  
728 *learning*. Springer Series in Statistics. Springer, New York, second edition. Data mining, inference,  
729 and prediction.
- 730 [Huggins et al., 2007] Huggins, P., Pachter, L., and Sturmfels, B. (2007). Toward the Human Geno-  
731 tope. *Bulletin of Mathematical Biology*, 69(8):2723–2735.
- 732 [Impagliazzo et al., 2014] Impagliazzo, R., Lovett, S., Paturi, R., and Schneider, S. (2014). 0-1 integer  
733 linear programming with a linear number of constraints. Technical report, Electronic Colloquium  
734 on Computational Complexity, Report No. 24.
- 735 [Kelly, 1956] Kelly, Jr., J. L. (1956). A new interpretation of information rate. *Bell. System Tech. J.*,  
736 35:917–926.
- 737 [Lan and Tu, 2016] Lan, G. and Tu, Y. (2016). Information processing in bacteria: Memory, compu-  
738 tation, and statistical physics: a key issues review. *Rep Prog Phys.*, 79(5):052601.
- 739 [Levchenko and Nemenman, 2014] Levchenko, A. and Nemenman, I. (2014). Cellular noise and infor-  
740 mation transmission. *Current Opinion in Biotechnology*, 28:156–164.
- 741 [Lewontin, 1995] Lewontin, R. C. (1995). *The Apportionment of Human Diversity*, pages 381–398.  
742 Springer US, Boston, MA.
- 743 [McCowan et al., 2002] McCowan, B., Doyle, L., and Hanser, S. (2002). Using information theory to  
744 assess the diversity, complexity, and development of communicative repertoires. *J. Comp. Psychol.*,  
745 116(2):166–72.

- 746 [Murphy, 2012] Murphy, K. P. (2012). *Machine Learning: A Probabilistic Perspective*. The MIT Press.
- 747 [Peng et al., 2005] Peng, H., Long, F., and Ding, C. (2005). Feature selection based on mutual in-  
748 formation criteria of max-dependency, max-relevance, and min-redundancy. *IEEE Transactions on*  
749 *Pattern Analysis and Machine Intelligence*, 27(8):1226–1238.
- 750 [Phillips et al., 2007] Phillips, C., Salas, A., Sanchez, J., Fondevila, M., Gomez-Tato, A., Alvarez-  
751 Dios, J., Calaza, M., Casares de Cal, M., Ballard, D., Lareu, M., and Carracedo, A. (2007). Inferring  
752 ancestral origin using a single multiplex assay of ancestry-informative marker SNPs. *Forensic Science*  
753 *International: Genetics*, 1(3-4):273–280.
- 754 [Rannala and Mountain, 1997] Rannala, B. and Mountain, J. L. (1997). Detecting immigration by  
755 using multilocus genotypes. *Proceedings of the National Academy of Sciences*, 94(17):9197–9201.
- 756 [Rosenberg, 2005] Rosenberg, N. A. (2005). Algorithms for selecting informative marker panels for  
757 population assignment. *Journal of Computational Biology*, 12(9):1183–1201.
- 758 [Rosenberg et al., 2003] Rosenberg, N. A., Li, L. M., Ward, R., and Pritchard, J. K. (2003). Infor-  
759 mativeness of genetic markers for inference of ancestry. *American Journal of Human Genetics*,  
760 73(6):1402–1422.
- 761 [Schervish, 1995] Schervish, M. J. (1995). *Theory of statistics*. Springer Series in Statistics. Springer-  
762 Verlag, New York.
- 763 [Shannon, 1948] Shannon, C. E. (1948). A mathematical theory of communication. *The Bell System*  
764 *Technical Journal*, 27(3):379–423.
- 765 [Shannon and Weaver, 1949] Shannon, C. E. and Weaver, W. (1949). *The Mathematical Theory of*  
766 *Communication*. The University of Illinois Press, Urbana, Ill.
- 767 [Tal, 2012a] Tal, O. (2012a). The cumulative effect of genetic markers on classification performance:  
768 Insights from simple models. *Journal of Theoretical Biology*, 293:206–218.
- 769 [Tal, 2012b] Tal, O. (2012b). Towards an information-theoretic approach to population structure. In  
770 *Turing-100. The Alan Turing Centenary*, volume 10 of *EasyChair Proceedings in Computing*, pages  
771 353–369. EasyChair.
- 772 [Tal, 2013] Tal, O. (2013). Two complementary perspectives on inter-individual genetic distance.  
773 *Biosystems*, 111(1):18 – 36.
- 774 [Ulanowicz et al., 2009] Ulanowicz, R. E., Goerner, S. J., Lietaer, B., and Gomez, R. (2009). Quantify-  
775 ing sustainability: Resilience, efficiency and the return of information theory. *Ecological Complexity*,  
776 6(1):27–36.
- 777 [Verdu and Han, 1994] Verdu, S. and Han, T. (1994). A general formula for channel capacity. *IEEE*  
778 *Trans. Inf. Theor.*, 40(4):1147–1157.
- 779 [Vinga, 2014] Vinga, S. (2014). Information theory applications for biological sequence analysis. *Brief-*  
780 *ings in Bioinformatics*, 15(3):376–389.
- 781 [Zhao et al., 2013] Zhao, M., Edakunni, N., Pocock, A., and Brown, G. (2013). Beyond Fano’s In-  
782 equality: Bounds on the Optimal F-Score, BER, and Cost-Sensitive Risk and Their Implications.  
783 *Journal of Machine Learning Research*, 14:1033–1090.
- 784 [Zuckerman, 1996] Zuckerman, D. (1996). On Unapproximable Versions of NP-Complete Problems.  
785 *SIAM Journal on Computing*, 25(6):1293–1304.

## 786 A Appendix A

### 787 A.1 Closed-form formulation of the naïve typicality classifier error rate

788 The error rate of the naïve typicality classifier can be expressed as,

$$\mathbb{E}_n = \frac{1}{2} \sum_{k=0}^{2^n-1} (h_k d_k + g_k (1 - d_k)). \quad (\text{A.1.1})$$

$$d_k = \begin{cases} 1, & \text{if } \begin{cases} D_k^{(P)} > \varepsilon_P \text{ and } D_k^{(Q)} \leq \varepsilon_Q, \text{ or} \\ D_k^{(P)} > \varepsilon_P \text{ and } D_k^{(Q)} > \varepsilon_Q \text{ and } D_k^{(P)} > D_k^{(Q)}, \text{ or} \\ D_k^{(P)} \leq \varepsilon_P \text{ and } D_k^{(Q)} \leq \varepsilon_Q \text{ and } \bar{H}_n^{(P)} > \bar{H}_n^{(Q)} \end{cases} \\ 0, & \text{if } \begin{cases} D_k^{(P)} \leq \varepsilon_P \text{ and } D_k^{(Q)} > \varepsilon_Q, \text{ or} \\ D_k^{(P)} > \varepsilon_P \text{ and } D_k^{(Q)} > \varepsilon_Q \text{ and } D_k^{(P)} \leq D_k^{(Q)}, \text{ or} \\ D_k^{(P)} \leq \varepsilon_P \text{ and } D_k^{(Q)} \leq \varepsilon_Q \text{ and } \bar{H}_n^{(P)} \leq \bar{H}_n^{(Q)} \end{cases} \end{cases}$$

789 where

$$D_k^{(P)} = \left| -\frac{1}{n} \sum_{i=1}^n \log_2 (|1 - f_n(k, i) - p_i|) - \bar{H}_n(P) \right|$$

$$D_k^{(Q)} = \left| -\frac{1}{n} \sum_{i=1}^n \log_2 (|1 - f_n(k, i) - q_i|) - \bar{H}_n(Q) \right|$$

790 and where the genotype probabilities  $h_k$  and  $g_k$  and the indicator function  $f_n$  are defined as in  
791 ([Tal, 2012b], section 3.2),

$$h_k = \prod_{i=1}^n |1 - f_n(k, i) - p_i|, \quad g_k = \prod_{i=1}^n |1 - f_n(k, i) - q_i| \quad (\text{A.1.2})$$

$$f_n(k, i) = \left\lfloor \frac{k}{2^i} \right\rfloor \bmod 2 \text{ (the } i^{\text{th}} \text{ bit of } k).$$

### 792 A.2 Closed-form formulation of the cross-entropy classifier error rate

793 The error rate of the cross-entropy typicality classifier can be expressed using  $\mathbb{E}_n$  of Eq. (A.1.1) in  
794 conjunction with,

$$d_k = \begin{cases} 1, & \text{if } \left| -\frac{1}{n} \sum_{i=1}^n \log_2 (|1 - f_n(k, i) - q_i|) - \bar{H}_n(Q) \right| \\ & < \left| -\frac{1}{n} \sum_{i=1}^n \log_2 (|1 - f_n(k, i) - q_i|) - \bar{H}_n(p, q) \right| \\ 0, & \text{otherwise} \end{cases} \quad (\text{A.2.1})$$

795 for the case where  $C_Q > C_P$ , and similarly expressed in terms of the parameters of  $P$  when  $C_Q \leq C_P$ .



### 796 A.3 Closed-form formulation of the generalization error of the cross-entropy clas- 797 sifier under MLE

798 The expected test error  $E_{n,m}$  under all training samples of size  $m = \{m1, m2\}$  is an expectation over  
799 the conditional (on a particular sample of size  $m$ ) test error  $\mathbb{E}_n(\hat{P}, \hat{Q})$ <sup>9</sup>,

$$\mathbb{E}_{n,m} = \mathbb{E}(\mathbb{E}_n(\hat{P}, \hat{Q})) = \sum_{X_1=0}^1 \cdots \sum_{X_n=0}^1 \sum_{Y_1=0}^1 \cdots \sum_{Y_n=0}^1 \mathbb{E}_n(\hat{P}, \hat{Q}) \prod_{i=1}^n f(\hat{p}_i) \cdot f(\hat{q}_i)$$

800 where we denote  $\hat{P} = \{\hat{p}_1, \dots, \hat{p}_n\}$ ,  $\hat{Q} = \{\hat{q}_1, \dots, \hat{q}_n\}$ .

801 Following the formulation in Eq. (A.1.1) we have,

$$\mathbb{E}_n(\hat{P}, \hat{Q}) = \frac{1}{2} \sum_{k=0}^{2^n-1} (h_k d_k + g_k (1 - d_k))$$

802 where the cross-entropy classifier of Eq. (A.2.1) (for the case  $C_Q > C_P$ ) is expressed as conditional  
803 on a particular sample,

$$d_k = \begin{cases} 1, & \text{if } \left| -\frac{1}{n} \sum_{i=1}^n \log_2 \left( |1 - f_n(k, i) - \hat{q}_i| \right) - \bar{H}_n(\hat{Q}) \right| \\ & < \left| -\frac{1}{n} \sum_{i=1}^n \log_2 \left( |1 - f_n(k, i) - \hat{p}_i| \right) - \bar{H}_n(\hat{P}) \right| \\ 0, & \text{otherwise} \end{cases}$$

804 where  $h_k, g_k, f_n(k, i)$  are defined with respect to the true frequencies, as in Eq. (A.1.2).

### 805 A.4 Closed-form formulation of the error rate of the relative-entropy classifier

806 Following the formulation in Eq. (A.1.1) the error rate of the relative-entropy classifier can be expressed  
807 as,

$$\mathbb{E}_n = \frac{1}{2} \sum_{k=0}^{2^n-1} (h_k d_k + g_k (1 - d_k))$$

$$D_k^{(P)} = \left| \frac{1}{n} \sum_{i=1}^n \log_2 \left( \frac{|1 - f_n(k, i) - \hat{p}_i|}{|1 - f_n(k, i) - \hat{q}_i|} \right) - \bar{D}_n(P||Q) \right|$$

$$D_k^{(Q)} = \left| \frac{1}{n} \sum_{i=1}^n \log_2 \left( \frac{|1 - f_n(k, i) - \hat{q}_i|}{|1 - f_n(k, i) - \hat{p}_i|} \right) - \bar{D}_n(Q||P) \right|$$

$$d_k = \begin{cases} 1, & \text{if } D_k^{(P)} > D_k^{(Q)} \\ 0, & \text{else} \end{cases}$$

811 where the genotype probabilities  $h_k$  and  $g_k$  and the indicator function  $f_n(k, i)$  are as defined in Eq.  
812 (A.1.2).

<sup>9</sup>In simulating  $E_{n,m}$  we replace allele frequency estimates of zero with a small constant,  $1/(m+1)$ , a common procedure to avoid zero genotype frequencies ([Rosenberg, 2005] [Phillips et al., 2007]).

813 Note that the counterpart classifier-expressions for a Bayes (or maximum likelihood) classifier would  
814 in a corresponding formulation be expressed as a simple comparison of genotype probabilities,

$$D_k(\text{Bayes}) = \sum_{i=1}^n \log_2 \frac{1 - f_n(k, i) - q_i}{1 - f_n(k, i) - p_i}, \quad d_k = \begin{cases} 1, & \text{if } D_k > 0 \\ 0, & \text{if } D_k \leq 0 \end{cases}$$

## 815 B Appendix B

### 816 B.1 Entropy and cross-entropy rates

817 In this section we consider the expectation of entropy and cross-entropy rates and their properties.

818 First, we recall some properties of a Beta distribution. Let  $Y \sim B(\alpha, \beta)$ . Then

$$\mathbb{E}(Y) = \frac{\alpha}{\alpha + \beta},$$

819 
$$\mathbb{E}(\ln Y) = \psi(\alpha) - \psi(\alpha + \beta),$$

820 where  $\psi(x) = \frac{d}{dx} \ln(\Gamma(x)) = \frac{\Gamma'(x)}{\Gamma(x)}$  is a digamma function. Moreover, we have

$$\mathbb{E}(Y \ln Y) = \frac{\beta}{(\alpha + \beta)^2} + \frac{\alpha}{\alpha + \beta} (\psi(\alpha) - \psi(\alpha + \beta)).$$

821 In fact, note that  $Y \sim B(\alpha, \beta)$  implies that  $1 - Y \sim B(\beta, \alpha)$ . Therefore

$$\begin{aligned} \text{Cov}(Y, \ln Y) &= \mathbb{E}(Y \ln Y) - \mathbb{E}(Y)\mathbb{E}(\ln Y) \\ &= \int_0^1 \ln y \frac{y^\alpha(1-y)^{\beta-1}}{B(\alpha, \beta)} dy - \frac{\alpha}{\alpha + \beta} \int_0^1 \ln y \frac{y^{\alpha-1}(1-y)^{\beta-1}}{B(\alpha, \beta)} dy \\ &= \frac{\alpha}{\alpha + \beta} \left( \int_0^1 \ln y \frac{y^\alpha(1-y)^{\beta-1}}{B(\alpha + 1, \beta)} dy - \int_0^1 \ln y \frac{y^{\alpha-1}(1-y)^{\beta-1}}{B(\alpha, \beta)} dy \right) \\ &= \frac{\alpha}{\alpha + \beta} \left( (\psi(\alpha + 1) - \psi(\alpha + \beta + 1)) - (\psi(\alpha) - \psi(\alpha + \beta)) \right) \\ &= \frac{\alpha}{\alpha + \beta} \left( \frac{1}{\alpha} - \frac{1}{\alpha + \beta} \right) \\ &= \frac{\beta}{(\alpha + \beta)^2}. \end{aligned}$$

822 Therefore

$$\mathbb{E}(Y \ln Y) = \frac{\beta}{(\alpha + \beta)^2} + \frac{\alpha}{\alpha + \beta} (\psi(\alpha) - \psi(\alpha + \beta)).$$

823 Suppose  $p_i$  and  $q_i$  are distributed i.i.d. according to  $B(\alpha_P, \beta_P)$  and  $B(\alpha_Q, \beta_Q)$  respectively. Then

$$\begin{aligned} \mathbb{E}(\overline{H}_n(Q)) &= -\frac{1}{n} \sum_{i=1}^n \mathbb{E}(q_i \log_2 q_i + (1 - q_i) \log_2(1 - q_i)) \\ &= -\log_2(e) \left( \frac{1}{\alpha_Q + \beta_Q} + \frac{\alpha_Q}{\alpha_Q + \beta_Q} (\psi(\alpha_Q) - \psi(\alpha_Q + \beta_Q)) \right), \end{aligned}$$

824 and similarly,

$$\mathbb{E}(\overline{H}_n(p, q)) = -\log_2(e) \left( \frac{\alpha_P \psi(\alpha_Q)}{\alpha_P + \beta_P} + \frac{\beta_P \psi(\beta_Q)}{\alpha_P + \beta_P} - \psi(\alpha_Q + \beta_Q) \right).$$

## 825 B.2 Cross-entropy criteria

826 In this section of Appendix, we consider the cross-entropy criteria  $C_P^n$  and  $C_Q^n$  and its asymptotic  
827 properties. First, we have

$$\begin{aligned} C_Q^n &= |\overline{H}_n(p, q) - \overline{H}_n(Q)| \\ &= \left| \frac{1}{n} \sum_{i=1}^n (q_i - p_i) \log_2 \frac{q_i}{1 - q_i} \right|. \end{aligned}$$

828 Assume that  $p_i, i = 1, 2, \dots$ , sampled by a random variable  $X$  with distribution  $B(\alpha_P, \beta_P)$  and  
829  $q_i, i = 1, 2, \dots$ , sampled by another independent random variable  $Y$  with distribution  $B(\alpha_Q, \beta_Q)$ .  
830 Then, by the law of large number we have the asymptotic property

$$\begin{aligned} C_Q &:= \lim_{n \rightarrow \infty} C_Q^n = \left| \mathbb{E} \left( (Y - X) \log_2 \left( \frac{Y}{1 - Y} \right) \right) \right| \\ &= \log_2(e) \left| \mathbb{E} \left( Y \ln \left( \frac{Y}{1 - Y} \right) \right) - \mathbb{E} X \mathbb{E} \left( \ln \left( \frac{Y}{1 - Y} \right) \right) \right|, \quad (\text{due to } X, Y \text{ are independent}) \\ &= \log_2(e) \left| \mathbb{E} (Y \ln Y) - \mathbb{E} (Y \ln(1 - Y)) - \mathbb{E}(X) (\ln Y - \ln(1 - Y)) \right| \\ &= \log_2(e) \left| \mathbb{E} (Y \ln Y) + \mathbb{E} ((1 - Y) \ln(1 - Y)) - \mathbb{E} \ln(1 - Y) - \mathbb{E}(X) (\ln Y - \ln(1 - Y)) \right| \end{aligned}$$

831 It implies that

$$C_Q = \log_2(e) \left| \frac{1}{\alpha_Q + \beta_Q} + \left( \psi(\alpha_Q) - \psi(\beta_Q) \right) \left( \frac{\alpha_Q}{\alpha_Q + \beta_Q} - \frac{\alpha_P}{\alpha_P + \beta_P} \right) \right|.$$

832 And similarly we also obtain

$$C_P = \log_2(e) \left| \frac{1}{\alpha_P + \beta_P} + \left( \psi(\alpha_P) - \psi(\beta_P) \right) \left( \frac{\alpha_P}{\alpha_P + \beta_P} - \frac{\alpha_Q}{\alpha_Q + \beta_Q} \right) \right|.$$

833 Then we have immediately some corollaries:

834 **Corollary B.2.1.**  $C_Q = 0$  if and only if

$$\frac{\alpha_P}{\alpha_P + \beta_P} = \frac{\alpha_Q}{\alpha_Q + \beta_Q} + \frac{1}{(\alpha_Q + \beta_Q)(\psi(\alpha_Q) - \psi(\beta_Q))}.$$

835 Note that this equation has a lot of solutions (e.g.  $\alpha_P = 2, \beta_P = 10, \alpha_Q = 2, \beta_Q = 4$ ).

836 **Corollary B.2.2.** If  $\overline{H}_n(P) > \overline{H}_n(Q)$  and  $\overline{H}_n(P) > \overline{H}_n(q, p)$  then  $C_Q^n > C_P^n$ .

837 *Proof.* In fact, we have

$$\overline{H}_n(p, q) - \overline{H}_n(Q) - (\overline{H}_n(P) - \overline{H}_n(q, p)) = \overline{D}_n(P, Q) + \overline{D}_n(Q, P) > 0.$$

838 It implies that

$$\overline{H}_n(p, q) - \overline{H}_n(Q) > \overline{H}_n(P) - \overline{H}_n(q, p).$$

839 Moreover, due to the second condition, we have  $\overline{H}_n(P) - \overline{H}_n(q, p) > 0$ . Therefore,

$$C_Q^n = \overline{H}_n(p, q) - \overline{H}_n(Q) > \overline{H}_n(P) - \overline{H}_n(q, p) = C_P^n.$$

840 It completes the proof. □

841 **Corollary B.2.3.** Assume that  $P \sim B(\alpha_P, \beta_P)$  and  $Q \sim B(\alpha_Q, \beta_Q)$  satisfying  $c_P = \alpha_P + \beta_P =$   
 842  $\alpha_Q + \beta_Q = c_Q$  and  $\bar{P} = \frac{\alpha_P}{c_P} \leq \frac{1}{2}, \bar{Q} = \frac{\alpha_Q}{c_Q} \leq \frac{1}{2}$ . If furthermore  $\lim_{n \rightarrow \infty} \bar{H}_n(P) > \lim_{n \rightarrow \infty} \bar{H}_n(Q)$ , then  
 843  $C_Q > C_P$ .

844 *Proof.* In fact, it is enough to prove that for large enough  $n$  we have  $\bar{H}_n(p, q) - \bar{H}_n(Q) > \bar{H}_n(q, p) -$   
 845  $\bar{H}_n(P)$ . Indeed, note that

$$\lim_{n \rightarrow \infty} \bar{H}_n(P) = -\frac{1}{c_P} - \bar{P}\psi(\bar{P}c_P) - (1 - \bar{P})\psi(c_P - \bar{P}c_P) + \psi(c_P).$$

846 Therefore, the condition  $\bar{H}_n(P) - \bar{H}_n(Q) > \varepsilon$  for all  $n$  implies that

$$-\bar{P}\psi(\bar{P}c_P) - (1 - \bar{P})\psi(c_P - \bar{P}c_P) > -\bar{Q}\psi(\bar{Q}c_Q) - (1 - \bar{Q})\psi(c_Q - \bar{Q}c_Q)$$

847 which implies that  $\bar{P} > \bar{Q}$ .

848 Also we have

$$\lim_{n \rightarrow \infty} \bar{H}_n(p, q) - \bar{H}_n(Q) = \frac{1}{c_Q} + (\bar{Q} - \bar{P})\left(\psi(\bar{Q}c_Q) - \psi(c_Q - \bar{Q}c_Q)\right),$$

849 and  $\psi(\bar{Q}c_Q) - \psi(c_Q - \bar{Q}c_Q)$  is decreasing with respect to  $\bar{Q}$ . It implies the proof.

850 □

851 **Remark B.2.1.** If  $C_P = C_Q = 0$  then

$$0 = \bar{H}_n(p, q) - \bar{H}_n(Q) = \bar{D}_n(P\|Q) + \bar{H}_n(P) - \bar{H}_n(Q)$$

852 and

$$0 = \bar{H}_n(q, p) - \bar{H}_n(P) = \bar{D}_n(Q\|P) + \bar{H}_n(Q) - \bar{H}_n(P)$$

853 This implies that  $\bar{D}_n(P\|Q) = \bar{D}_n(Q\|P) = 0$  which happens if and only if  $P = Q$ .

### 854 B.3 Normalized pairwise distances

855 In this section, we first consider the average normalized pairwise distance [Tal, 2013] in the set of  
 856 all sampled genotypes and in the set of typical ones. We consider both the stationary and the non-  
 857 stationary case.

#### 858 B.3.1 Stationary case

859 In the stationary case  $p_i = p$  for all  $i = 1, \dots, n$  we have some first geometric properties of typical set  
 860 as follows. Given  $\varepsilon > 0$  and  $n \in \mathbb{N}$ , denote by

$$I_n = \left\{ k : \left[ n \left( p - \frac{\varepsilon}{\log \left| \frac{1-p}{p} \right|} \right) \right] \leq k \leq \left[ n \left( p + \frac{\varepsilon}{\log \left| \frac{1-p}{p} \right|} \right), \right] \right\}.$$

861 Then

(i)

$$A_\varepsilon^{(n)}(P) = \left\{ \mathbf{x} \in \Omega_n : |\mathbf{x}| \in I_n \right\}.$$

(ii)

$$|A_\varepsilon^{(n)}(P)| = \sum_{k \in I_n} \binom{n}{k}, \quad \text{it implies that } \frac{|A_\varepsilon^{(n)}(P)|}{2^n} \rightarrow 0 \text{ as } n \rightarrow \infty.$$

(iii)

$$P(A_\varepsilon^{(n)}(P)) = \sum_{k \in I_n} \binom{n}{k} p^k (1-p)^{n-k} \rightarrow 1 \text{ as } n \rightarrow \infty.$$

(iv)

$$\mathbb{E}_P \left( \frac{1}{n} d(X, Y) | X, Y \in A_\varepsilon^{(n)}(P) \right) = \frac{\sum_{k, l \in I_n} \frac{1}{n} \sum_{|\mathbf{x}|=k, |\mathbf{y}|=l} |\mathbf{x} - \mathbf{y}| p^{k+l} (1-p)^{2n-k-l}}{P(A_\varepsilon^{(n)}(P))^2}$$

(v)

$$\mathbb{E}_P \left( \frac{1}{n} d(X, Y) \right) = 2p(1-p).$$

862 Let  $C$  be the centroid of  $\Omega_n$  corresponding to distribution  $P$ , i.e.  $c_i = p_i$  for all  $i = 1, \dots, n$ . We  
863 also have a nice following property

864 **Proposition B.3.1.** *The covariance between the normalized generalized Hamming ( $\|\cdot\|_1$ ) distance*  
865 *between  $X$  and  $C$  with respect to the Euclidean distance of their corresponding points in log-probability*  
866 *coordinate is non-negative, i.e.*

(a)

$$\text{Cov} \left( \frac{1}{n} d_{Ham}(X, \mathbf{C}), \left| -\frac{1}{n} \log_2 P(X) - \bar{H}_n(P) \right| \right) \geq 0;$$

867 (b) *Equality holds if and only if  $p = \frac{1}{2}$ ;*

868 (c) *as  $n$  goes to infinity, this covariance goes to zero;*

869 (d) *when the entropy rate increases, the covariance decreases;*

870 (e) *statements in (a)-(d) are also true for correlation.*

871 *Proof.* First of all, note that in this case

$$d_{Ham}(X, \mathbf{C}) = \sum_{i=1}^n |X_i - p| = |X|(1-p) + (n - |X|)p, \quad \text{for every } X.$$

872 Therefore, it is easy to obtain

$$\begin{aligned} & \text{Cov} \left( \frac{1}{n} d_{Ham}(X, \mathbf{C}), \left| -\frac{1}{n} \log_2 P(X) - \bar{H}_n(P) \right| \right) \\ &= \left| \log_2 \frac{p}{1-p} \right| (1-2p) \sum_{k=0}^n \binom{k}{n} \left| \frac{k}{n} - p \right| \binom{n}{k} p^k (1-p)^{n-k}. \end{aligned}$$

873 Put

$$h(n, p) := \left| \log_2 \frac{p}{1-p} \right| (1-2p) \sum_{k=0}^n \binom{k}{n} \left| \frac{k}{n} - p \right| \binom{n}{k} p^k (1-p)^{n-k}.$$



874 It is also easy to see that  $h(n, p) = h(n, 1 - p)$ . Without loss of generality, we assume that  $p \leq \frac{1}{2}$ .  
 875 When  $p = \frac{1}{2}$ , the covariance is zero. Moreover, we can prove that  $h(n, p)$  decreases in  $p \in (0, \frac{1}{2}]$  and in  
 876  $n$ .

877 It implies the proof. □

### 878 B.3.2 Non-stationary case

879 Now we consider the non-stationary case. First, denote by  $D_n(X, Y)$  the normalized Hamming distance  
 880 of two genotypes  $X$  and  $Y$ , i.e.

$$D_n(X, Y) = \frac{1}{n} \sum_{i=1}^n |X_i - Y_i| = \frac{1}{n} \sum_{i=1}^n |Z_i|,$$

881 where  $Z_i$  is a random variable which is 1 with probability  $2p_i(1-p_i)$  and 0 with probability  $p_i^2 + (1-p_i)^2$ .

882 Then the expectation and variance of  $D_n$  can be easily calculated as

$$\mathbb{E}(D_n(X, Y)|X, Y \in \Omega_n) = \frac{2}{n} \sum_{i=1}^n p_i(1-p_i),$$

883

$$\text{Var}(D_n(X, Y)|X, Y \in \Omega_n) = \frac{1}{n^2} \sum_{i=1}^n \text{Var}(Z_i) = \frac{1}{n^2} \sum_{i=1}^n 2p_i(1-p_i)(p_i^2 + (1-p_i)^2).$$

884 **Corollary B.3.1.** *The variance of the normalized Hamming distance between two genotypes will ap-*  
 885 *proach to zero with rate  $1/4n$  as  $n \rightarrow \infty$ , i.e. there is an equidistance property as  $n$  large for the set of*  
 886 *total sampled genotypes.*

887 *Proof.* The statement follows from

$$\text{Var}(D_n(X, Y)|X, Y \in \Omega_n) = \frac{1}{n^2} \sum_{i=1}^n 2p_i(1-p_i)(p_i^2 + (1-p_i)^2) < \frac{1}{4n} \rightarrow 0 \text{ as } n \rightarrow \infty.$$

888 □

889 This explains that when  $n$  large enough, even though the portion of the typical genotypes is small,  
 890 the normalized Hamming distance between two genotypes is close to the normalized Hamming distance  
 891 of two  $(n, \varepsilon)$ -typical genotypes.

892 Now, given  $\varepsilon > 0$  and  $n \in \mathbb{N}$ , we denote by  $\mathbb{E}(D_n(X, Y)|X, Y \in A_\varepsilon^{(n)}(P))$  the average normalized  
 893 Hamming distance of two typical genotypes. Then

894 **Proposition B.3.2.** *The following estimates holds for  $n$  large enough,*

$$\frac{2 \sum_{i=1}^n p_i(1-p_i) - (1 - \mathbb{P}(A_\varepsilon^{(n)}(P)))^2}{n\mathbb{P}(A_\varepsilon^{(n)}(P))^2} \leq \mathbb{E}(D_n(X, Y)|X, Y \in A_\varepsilon^{(n)}(P)) \leq \frac{2 \sum_{i=1}^n p_i(1-p_i)}{n\mathbb{P}(A_\varepsilon^{(n)}(P))^2}.$$

895 *Proof.* We note that for  $n$  large then  $1 - \varepsilon \leq \mathbb{P}(A_\varepsilon^{(n)}(P)) \leq 1$ . Therefore

$$\begin{aligned}
 \mathbb{E}_P \left( D_n(X, Y) \middle| X, Y \in A_\varepsilon^{(n)}(P) \right) &= \frac{\sum_{(x,y) \in A_\varepsilon^{(n)}(P)^2} \frac{1}{n} d_{Ham}(\mathbf{x}, \mathbf{y}) P(\mathbf{x}, \mathbf{y})}{\sum_{(x,y) \in A_\varepsilon^{(n)}(P)^2} P(\mathbf{x}, \mathbf{y})} \\
 &= \frac{\sum_{(x,y) \in \Omega_n^2} d_{Ham}(\mathbf{x}, \mathbf{y}) P(\mathbf{x}, \mathbf{y}) - \sum_{(x,y) \notin A_\varepsilon^{(n)}(P)^2} d_{Ham}(\mathbf{x}, \mathbf{y}) P(\mathbf{x}, \mathbf{y})}{n \mathbb{P}(A_\varepsilon^{(n)}(P))^2} \\
 &\geq \frac{2 \sum_{i=1}^n p_i(1-p_i) - n \sum_{(x,y) \notin A_\varepsilon^{(n)}(P)^2} P(\mathbf{x}, \mathbf{y})}{n \mathbb{P}(A_\varepsilon^{(n)}(P))^2}.
 \end{aligned}$$

896 It implies the proof. □

897 We then immediately have following corollaries:

898 **Corollary B.3.2.** *We have for  $n$  large*

$$\mathbb{E}_{B(\alpha, \beta)} \left( \mathbb{E}_P \left( D_n(X, Y) \middle| \mathbf{X}, \mathbf{Y} \in A_\varepsilon^{(n)}(P) \right) \right) \geq f(\alpha, \beta) := \frac{2\alpha\beta}{(\alpha + \beta)(\alpha + \beta + 1)}.$$

899 **Corollary B.3.3.** *This lower bound  $f(\alpha, \beta)$  is monotone along the average entropy rate  $\mathbb{E}_{B(\alpha, \beta)} \bar{H}_n(P)$ .  
 900 It means that when the average entropy rate increases then the below bound  $f(\alpha, \beta)$  increases and vice  
 901 verse.*

902 We also have a nice following property

903 **Theorem B.3.1.** *The correlation between the absolutely difference of logarithm with base 2 of proba-  
 904 bilities of two arbitrary genotypes and their Hamming distance is always non-negative, i.e.*

$$\text{corr} \left( d_H(X, Y), |\log_2 P(X) - \log_2 P(Y)| \right) \geq 0.$$

905 *Proof.* First, by denoting

$$S_n := \mathbb{E} \left( \left| \log_2 P(X_1, \dots, X_n) - \log_2 P(Y_1, \dots, Y_n) \right| \right), \quad \text{and}$$

$$906 \quad S_{n-1}^{(i)} := \mathbb{E} \left( \left| \log_2 P(X_1, \dots, X_{i-1}, X_{i+1}, \dots, X_n) - \log_2 P(Y_1, \dots, Y_{i-1}, Y_{i+1}, \dots, Y_n) \right| \right),$$

907 it is easy to see that

$$S_n \geq S_{n-1}^{(i)}, \quad \text{for all } i = 1, \dots, n.$$

908 Indeed, we have (for shorting the notations, we use here  $\bar{x}_i$  for  $(x_1, \dots, x_{i-1}, x_{i+1}, \dots, x_n)$ )

$$\begin{aligned}
 \mathbb{E}\left(\left|\log_2 P(X) - \log_2 P(Y)\right|\right) &= \sum_{\mathbf{x}, \mathbf{y} \in \Omega_n} |\log_2 P(\mathbf{x}) - \log_2 P(\mathbf{y})| P(\mathbf{x}) P(\mathbf{y}) \\
 &= \sum_{\bar{x}_i, \bar{y}_i} |\log_2(p_i P(\bar{x}_i)) - \log_2((1-p_i)P(\bar{y}_i))| p_i P(\bar{x}_i) (1-p_i) P(\bar{y}_i) \\
 &\quad + \sum_{\bar{x}_i, \bar{y}_i} |\log_2((1-p_i)P(\bar{x}_i)) - \log_2(p_i P(\bar{y}_i))| (1-p_i) P(\bar{x}_i) p_i P(\bar{y}_i) \\
 &\quad + \sum_{\bar{x}_i, \bar{y}_i} |\log_2(p_i P(\bar{x}_i)) - \log_2(p_i P(\bar{y}_i))| p_i P(\bar{x}_i) p_i P(\bar{y}_i) \\
 &\quad + \sum_{\bar{x}_i, \bar{y}_i} |\log_2((1-p_i)P(\bar{x}_i)) - \log_2((1-p_i)P(\bar{y}_i))| (1-p_i) P(\bar{x}_i) (1-p_i) P(\bar{y}_i) \\
 &= \sum_{\bar{x}_i, \bar{y}_i} \left| \log_2 P(\bar{x}_i) - \log_2 P(\bar{y}_i) \right| P(\bar{x}_i) P(\bar{y}_i) \\
 &= S_{n-1}^{(i)}.
 \end{aligned}$$

909 Therefore,

$$\begin{aligned}
 \mathbb{E}\left(d_H(X, Y) \left| \log_2 P(X) - \log_2 P(Y) \right|\right) &= \sum_{\mathbf{x}, \mathbf{y} \in \Omega_n} d_H(\mathbf{x}, \mathbf{y}) |\log_2 P(\mathbf{x}) - \log_2 P(\mathbf{y})| P(\mathbf{x}) P(\mathbf{y}) \\
 &= \sum_{i=1}^n \sum_{x_i, y_i} |x_i - y_i| \sum_{\bar{x}_i, \bar{y}_i} |\log_2 P(\mathbf{x}) - \log_2 P(\mathbf{y})| P(\mathbf{x}) P(\mathbf{y}) \\
 &= \sum_{i=1}^n \sum_{\bar{x}_i, \bar{y}_i} |\log_2(p_i P(\bar{x}_i)) - \log_2((1-p_i)P(\bar{y}_i))| p_i P(\bar{x}_i) (1-p_i) P(\bar{y}_i) \\
 &\quad + \sum_{i=1}^n \sum_{\bar{x}_i, \bar{y}_i} |\log_2((1-p_i)P(\bar{x}_i)) - \log_2(p_i P(\bar{y}_i))| (1-p_i) P(\bar{x}_i) p_i P(\bar{y}_i) \\
 &= \sum_{i=1}^n \left[ \mathbb{E}\left(\left|\log_2 P(X) - \log_2 P(Y)\right|\right) \right. \\
 &\quad \left. - \left(p_i^2 + (1-p_i)^2\right) \sum_{\bar{x}_i, \bar{y}_i} \left| \log_2 P(\bar{x}_i) - \log_2 P(\bar{y}_i) \right| P(\bar{x}_i) P(\bar{y}_i) \right] \\
 &= nS_n - \sum_{i=1}^n \left(p_i^2 + (1-p_i)^2\right) S_{n-1}^{(i)} \\
 &\geq \left(n - \sum_{i=1}^n (p_i^2 + (1-p_i)^2)\right) S_n \\
 &= \sum_{i=1}^n 2p_i(1-p_i) S_n \\
 &= \mathbb{E}\left(d_H(X, Y)\right) \mathbb{E}\left(\left|\log_2 P(X) - \log_2 P(Y)\right|\right).
 \end{aligned}$$

910 This implies the proof. □

## 911 B.4 Non-stationary AEP

912 In this section of the Appendix, we consider some AEP properties in the non-stationary case:

913 **Proposition B.4.1.** 1. Given a sequence of binary independent random variables  $\{X_n\}$  with the  
 914 corresponding mass probability functions  $p_n(\cdot)$  satisfying

$$\lim_{n \rightarrow \infty} \frac{\text{Var}_{p_n} \{-\log_2 p_n(X_n)\}}{n} = 0.$$

915 Then, we have

$$\lim_{n \rightarrow \infty} P \left\{ \left| -\frac{1}{n} \log_2 P(X) - \bar{H}_n(P) \right| \geq \varepsilon \right\} = 0, \quad \forall \varepsilon > 0,$$

916 where  $P = (p_1, \dots, p_n)$ ,  $X = (X_1, \dots, X_n)$  and  $\bar{H}_n(P)$  is the entropy rate with respect to  $P$ .

917 2. Given a sequence of binary independent random variables  $\{X_n\}$  with the corresponding mass  
 918 probability functions  $q_n(\cdot)$  satisfying  $\lim_{n \rightarrow \infty} \frac{\text{Var}_{q_n} \{-\log_2 p_n(X_n)\}}{n} = 0$ . Then, we have

$$\lim_{n \rightarrow \infty} Q \left\{ \left| -\frac{1}{n} \log_2 P(X) - \bar{H}_n(q, p) \right| \geq \varepsilon \right\} = 0, \quad \forall \varepsilon > 0,$$

919 where  $Q = (q_1, \dots, q_n)$ ,  $X = (X_1, \dots, X_n)$  and  $\bar{H}_n(q, p)$  is the cross entropy rate of  $Q$  with  
 920 respect to  $P$ .

921 *Proof.* We will prove the second statement. The first one can be done similarly. Indeed, we have

$$\begin{aligned} & Q \left\{ \left| -\frac{1}{n} \log_2 P(X) - \bar{H}_n(q, p) \right| \geq \varepsilon \right\} \\ &= Q \left\{ \left| -\frac{1}{n} \log_2 P(X) - \mathbb{E}_Q \left( -\frac{1}{n} \log_2 P(X) \right) \right| \geq \varepsilon \right\} \\ &\leq \frac{\text{Var}_Q \left( -\frac{1}{n} \log_2 P(X) \right)}{\varepsilon^2} \quad (\text{by Markov's inequality}) \tag{B.4.1} \\ &= \frac{\mathbb{E}_Q \left( \sum_{i=1}^n \left( \log_2 p_i(X_i) + H(q_i, p_i) \right) \right)^2}{n^2 \varepsilon^2} \\ &= \frac{\sum_{i=1}^n \text{Var}_{q_i} \left( \log_2 p_i(X_i) \right)}{n^2 \varepsilon^2} \quad (\text{by independency}) \end{aligned}$$

922 Therefore we obtain

$$\begin{aligned} \lim_{n \rightarrow \infty} Q \left\{ \left| -\frac{1}{n} \log_2 P(X) - \bar{H}_n(q, p) \right| \geq \varepsilon \right\} &\leq \lim_{n \rightarrow \infty} \frac{\sum_{i=1}^n \text{Var}_{q_i} \left( \log_2 p_i(X_i) \right)}{n^2 \varepsilon^2} \\ &= \lim_{n \rightarrow \infty} \frac{\text{Var}_{q_n} \left( \log_2 p_n(X_n) \right)}{2n \varepsilon^2} \\ &= 0 \quad (\text{due to the condition}). \end{aligned}$$

923 It implies the proof. □

924 **Proposition B.4.2.** Let  $\{X_n\}_n$  be a sequence of mutual independent random variables with given  
 925 binomial distribution  $X_k \sim P_k \in \text{Bin}(p_k)$ . Given any other sequence of binomial distributions  $Q_k \in$   
 926  $\text{Bin}(q_k)$  with assumption that  $0 < \delta \leq p_k, q_k \leq 1 - \delta$  for all  $k$ . Then

$$\frac{1}{n} \log_2 \frac{P(X_1, \dots, X_n)}{Q(X_1, \dots, X_n)} - \bar{D}_n(P \| Q) \xrightarrow{\text{a.e.}} 0 \quad (n \rightarrow \infty).$$

927 *Proof.* Denote by  $Y_k = \log_2 \frac{P_k(X_k)}{Q_k(X_k)}$  and its sample average  $\bar{Y}_n = \frac{1}{n} \sum_{k=1}^n Y_k$ . Note that

$$\mathbb{E}_P(\bar{Y}_n) = \bar{D}_n(P\|Q).$$

928 Moreover, from the assumption of  $p_k, q_k$  we have

$$\text{Var}_P(Y_k) \leq \left( \log_2 \left( \frac{1-\delta}{\delta} \right) \right)^2.$$

929 Therefore by applying the strong law of large numbers we obtain the result. □

## 930 C Appendix C

### 931 C.1 Quantitative versions of the AEP

932 In this section of the appendix, we will show the following quantitative versions of the AEP and the  
933 cross-entropy AEP. For all  $\epsilon > 0$  and  $n \in \mathbb{N}$ , it holds that

$$\Pr_p \left[ \left| -\frac{1}{n} \log p(\mathbf{X}) - \bar{H}_n(p) \right| > \epsilon \right] < 2 \exp \left( -\frac{2n\epsilon^2}{\log^2 \frac{\delta}{1-\delta}} \right) \quad (\text{C.1.1})$$

934 and

$$\Pr_p \left[ \left| -\frac{1}{n} \log q(\mathbf{X}) - \bar{H}_n(p, q) \right| > \epsilon \right] < 2 \exp \left( -\frac{2n\epsilon^2}{\log^2 \frac{\delta}{1-\delta}} \right), \quad (\text{C.1.2})$$

935 where by  $\Pr_p$  we denote the probability given that the genotype  $\mathbf{X}$  is distributed according to  $P$ .

936 These estimates can be obtained as follows. Suppose  $Z_1, \dots, Z_n$  are independent, real-valued  
937 random variables, with  $Z_i$  taking values in the interval  $[a_i, b_i]$ . Then the Hoeffding inequality states  
938 that

$$\Pr \left[ \left| -\frac{1}{n} \sum_{i=1}^n Z_i - \mathbb{E} \left[ \frac{1}{n} \sum_{i=1}^n Z_i \right] \right| \geq \epsilon \right] \leq 2 \exp \left( -\frac{2n\epsilon^2}{\frac{1}{n} \sum_{i=1}^n (a_i - b_i)^2} \right).$$

939 First, we apply the Hoeffding inequality to the random variables  $Z_i$  taking on the value  $-\log p_i$   
940 with probability  $p_i$ , and the value  $-\log(1 - p_i)$  with probability  $(1 - p_i)$ . The Hoeffding inequality  
941 then implies

$$\Pr_p \left[ \left| -\frac{1}{n} \log p(\mathbf{X}) - \bar{H}_n(p) \right| \geq \epsilon \right] \leq 2 \exp \left( -\frac{2n\epsilon^2}{\frac{1}{n} \sum_{i=1}^n \log^2 \frac{p_i}{1-p_i}} \right). \quad (\text{C.1.3})$$

942 Similarly, we could define  $Z_i$  to be equal to  $-\log q_i$  with probability  $p_i$  and equal to  $-\log(1 - q_i)$   
943 with probability  $(1 - p_i)$ . Then, the Hoeffding inequality reads

$$\Pr_p \left[ \left| -\frac{1}{n} \log q(\mathbf{X}) - \bar{H}_n(p, q) \right| \geq \epsilon \right] \leq 2 \exp \left( -\frac{2n\epsilon^2}{\frac{1}{n} \sum_{i=1}^n \log^2 \frac{q_i}{1-q_i}} \right). \quad (\text{C.1.4})$$

944 Note that the above inequalities can be viewed as versions of the AEP with explicit, exponential error  
945 bounds, for non-stationary sources.

### 946 C.2 Error bounds for typicality classifiers

947 In this section we explain how the quantitative versions of the AEP from the last section imply  
948 exponential error bounds for the typicality classifiers introduced in the main text.

#### 949 C.2.1 Error bound for naive typicality classifier

950 We assume without loss of generality that  $\bar{H}_n(q) \leq \bar{H}_n(p)$ . We recall the definition of the constants

$$C_P := |\bar{H}_n(q, p) - \bar{H}_n(p)|, \quad C_Q := |\bar{H}_n(p, q) - \bar{H}_n(q)|. \quad (\text{C.2.1})$$

951 and the definition of the error rate

$$E_n = \frac{1}{2} \Pr_p[\mathbf{X} \text{ is classified to } Q] + \frac{1}{2} \Pr_q[\mathbf{X} \text{ is classified to } P].$$



952 We note that in the naive typicality classifier, given that a sample  $\mathbf{X}$  comes from  $Q$ , an error can  
 953 only be made, that is it can only be assigned to  $P$ , if

$$\left| -\frac{1}{n} \log q(\mathbf{X}) - \bar{H}_n(q) \right| \geq \frac{C_Q}{2}.$$

954 The quantitative AEP bounds the probability of this event by

$$\Pr_q \left[ \left| -\frac{1}{n} \log q(\mathbf{X}) - \bar{H}_n(q) \right| \geq \frac{C_Q}{2} \right] \leq 2 \exp \left( -\frac{nC_Q^2}{2 \log^2 \frac{\delta}{1-\delta}} \right).$$

955 Given that a sample is drawn from  $P$ , an error can be made in two situations, either

$$\left| -\frac{1}{n} \log q(\mathbf{X}) - \bar{H}_n(p, q) \right| \geq \frac{C_Q}{2}$$

956 OR

$$\left| -\frac{1}{n} \log p(\mathbf{X}) - \bar{H}_n(p) \right| \geq \frac{C_Q}{2}.$$

957 The quantitative cross-entropy AEP bounds

$$\Pr_p \left[ \left| -\frac{1}{n} \log q(\mathbf{X}) - \bar{H}_n(p, q) \right| \geq \frac{C_Q}{2} \right] \leq 2 \exp \left( -\frac{nC_Q^2}{2 \log^2 \frac{\delta}{1-\delta}} \right),$$

958 whereas the quantitative AEP implies

$$\Pr_p \left[ \left| -\frac{1}{n} \log p(\mathbf{X}) - \bar{H}_n(p) \right| \geq \frac{C_Q}{2} \right] \leq 2 \exp \left( -\frac{nC_Q^2}{2 \log^2 \frac{\delta}{1-\delta}} \right).$$

959 Consequently,

$$E_n \leq 3 \exp \left( -\frac{nC_Q^2}{2 \log^2 \frac{\delta}{1-\delta}} \right).$$

### 960 C.2.2 Error bound for cross-entropy classifier

961 We now assume without loss of generality that  $C_Q > C_P$ . Note that given that a sample  $\mathbf{X}$  comes  
 962 from distribution  $Q$ , it can only be assigned to  $P$  if

$$\left| -\frac{1}{n} \log q(\mathbf{X}) - \bar{H}_n(q) \right| \geq \frac{C_Q}{2}.$$

963 As in the previous section, the quantitative AEP bounds this probability of this event by

$$\Pr_q \left[ \left| -\frac{1}{n} \log q(\mathbf{X}) - \bar{H}_n(q) \right| \geq \frac{C_Q}{2} \right] \leq 2 \exp \left( -\frac{nC_Q^2}{2 \log^2 \frac{\delta}{1-\delta}} \right).$$

964 Similarly, given that a sample  $\mathbf{X}$  comes from distribution  $P$ , it can only be assigned to  $Q$  if

$$\left| -\frac{1}{n} \log q(\mathbf{X}) - \bar{H}_n(p, q) \right| \geq \frac{C_Q}{2},$$

965 and the quantitative cross-entropy AEP estimates

$$\Pr_p \left[ \left| -\frac{1}{n} \log q(\mathbf{X}) - \bar{H}_n(p, q) \right| \geq \frac{C_Q}{2} \right] \leq 2 \exp \left( -\frac{nC_Q^2}{2 \log^2 \frac{\delta}{1-\delta}} \right).$$

966 Combining these two estimates we obtain

$$E_n = \frac{1}{2}\mathbb{P}_p[\mathbf{X} \text{ is classified to } Q] + \frac{1}{2}\mathbb{P}_q[\mathbf{X} \text{ is classified to } P] \\ \leq 2 \exp\left(\frac{nC_Q^2}{2\log^2\frac{\delta}{1-\delta}}\right).$$

967 In fact, by using one-sided Hoeffding inequalities (and corresponding one-sided AEPs), one can actually  
968 replace the prefactor 2 by 1.

### 969 C.3 Domain in log-probability plane

970 In this section we consider the limiting behavior for  $n \rightarrow \infty$  of the sets  $S_n \subset \mathbb{R}^2$  which we define by

$$S_n := \bigcup_{\mathbf{x} \in \{0,1\}^n} \left( -\frac{1}{n} \log p(\mathbf{X}), -\frac{1}{n} \log q(\mathbf{X}) \right).$$

971 These sets are the union of the image of all possible genotypes in the log-probability plane.

972 The claim is that (with probability one) these sets converge (in Hausdorff distance) to a certain  
973 closed, convex set  $A$ . This set  $A$  is determined by the distribution of the  $p_i$ 's and the  $q_i$ 's. Loosely  
974 speaking, for large  $n$ , for every point  $A$  there is a point in  $S_n$  closeby, and for every point in  $S_n$  there  
975 is a point in  $A$  closeby.

976 For simplicity, we assume that the gene frequencies  $p_i$  and  $q_i$  can only attain a finite number of  
977 values. We denote the possible values for  $p_i$  by  $a_1, \dots, a_N$  and the possible values for  $q_i$  by  $b_1, \dots, b_N$ .  
978 We assume moreover that  $0 < a_1 < \dots < a_N < 1$  and  $0 < b_1 < \dots < b_N < 1$ .

979 We denote by  $f(a_j, b_k)$  the probability that  $p_i = a_j$  and  $q_i = b_k$ .

980 By  $L(a, b)$  we denote the (unoriented) line segment between the points  $(-\log(a), -\log(b))$  and  
981  $(-\log(1-a), -\log(1-b))$ . Then the set  $A$  is the Minkowski linear combination of the line segments  
982  $L(a_j, b_k)$ , that is

$$A := \sum_{j=1}^N \sum_{k=1}^N f(a_j, b_k) L(a_j, b_k), \quad (\text{C.3.1})$$

983 where the sums on the right-hand-side denote Minkowski sums.

984 **Theorem C.3.1.** *With probability 1, the sequence of  $p_i$  and  $q_i$  is such that the set  $S_n$  converges to the*  
985 *set  $A$  in the Hausdorff distance as  $n \rightarrow \infty$ .*

986 A version of this theorem is also true when  $p_i$  and  $q_i$  are continuously distributed, under some  
987 extra conditions on the distribution (specifically their behavior close to 0 and 1). The set  $A$  then has  
988 a description as a 'Minkowski integral' rather than a Minkowski sum. We do not focus on this case to  
989 avoid technicalities.

990 The Hausdorff distance between two bounded and closed sets  $K_1$  and  $K_2$  is defined as the smallest  
991  $\epsilon \geq 0$  such that  $K_1$  is contained in  $T_\epsilon(K_2)$  and  $K_2$  is contained in  $T_\epsilon(K_1)$ , where

$$T_\epsilon(K_i) = \{z \in \mathbb{R}^2 \mid \text{dist}(z, K_i) \leq \epsilon\}.$$

992 We will explain the proof of the theorem. We let  $N_n(a_j, b_k)$  denote the number of indices  $i \in$   
993  $\{1, \dots, n\}$  such that  $p_i = a_j$  and  $q_i = b_k$ .

994 For the first part of the proof, we define auxiliary sets  $A_n$  by

$$A_n := \sum_{j=1}^N \sum_{k=1}^N \frac{N_n(a_j, b_k)}{n} L(a_j, b_k),$$

995 and we will show that  $A_n \rightarrow A$  in the Hausdorff distance. For instance by Sanov's theorem, it follows  
996 directly that with probability 1,

$$\frac{N_n(a_j, b_k)}{n} \rightarrow f(a_j, b_k).$$

997 By the continuity properties for the Minkowski sum it follows that the sets  $A_n$  converge in the Hausdorff  
998 distance to  $A$ .

999 With a bit more work (and an application of for instance Pinsker's inequality and the Borel-Cantelli  
1000 Lemma), one can also extract that with probability one, the convergence is faster than  $(\log n)/\sqrt{n}$ .

1001 In the second part of the proof, we show that the Hausdorff distance between  $A_n$  and  $S_n$  can be  
1002 bounded by  $C/n$ , for some constant  $C$ . In fact, we will see that  $A_n$  is the convex hull of  $S_n$ , while on  
1003 the other hand  $S_n$  is a  $C/n$ -net in  $A_n$ , which means that for every point in  $A_n$ , there is a point in  $S_n$   
1004 at distance less than  $C/n$ . First, we introduce some additional notation.

1005 For a line segment  $L$  in  $\mathbb{R}^2$ , we denote by  $B(L)$  and  $E(L)$  its endpoints, in such a way that  
1006  $B(L)_2 \leq E(L)_2$ , and if  $B(L)_2 = E(L)_2$ , then  $B(L)_1 \leq E(L)_1$ . These conditions uniquely define  $B(L)$   
1007 and  $E(L)$ .

1008 We will now give an equivalent description of the set  $S_n$ . We start with an important observation.  
1009 Given a string  $\mathbf{X} \in \{0, 1\}^n$ , the point

$$\left( -\frac{1}{n} \log p(\mathbf{X}), -\frac{1}{n} \log q(\mathbf{X}) \right)$$

1010 only depends on for how many indices  $i$ ,  $X_i = 1$  and  $p_i = a_j$ ,  $q_i = b_k$ . This motivates the following  
1011 definition.

1012 By  $M^n$  we denote the space of  $N \times N$  matrices  $x$  with integer entries that satisfy the constraints

$$0 \leq x_{jk} \leq N_n(a_j, b_k).$$

1013 For  $x \in M^n$  we denote by  $p_x^n$  the following point in  $\mathbb{R}^2$

$$p_x^n := \sum_{j=1}^N \sum_{k=1}^N \frac{N_n(a_j, b_k)}{n} \left( \frac{x_{jk}}{N_n(a_j, b_k)} B(L(a_j, b_k)) + \frac{N_n(a_j, b_k) - x_{jk}}{N_n(a_j, b_k)} E(L(a_j, b_k)) \right)$$

1014 It is then clear that we may rewrite  $S_n$  as

$$S_n = \bigcup_{x \in M^n} p_x^n.$$

1015 Moreover, it follows that  $S_n \subset A_n$ .

1016 Using this representation of  $S_n$ , we can now check that as  $n \rightarrow \infty$ , the Hausdorff distance between  
1017  $S_n$  and  $A_n$  is bounded by  $C/n$ , thereby proving the theorem.

1018 A line segment is the convex hull of its endpoints. For two sets  $B_1$  and  $B_2$ , the convex hull of  
1019  $B_1 + B_2$  is equal to the convex hull of  $B_1$  plus the convex hull of  $B_2$ . Therefore, the set  $A_n$  is equal to  
1020 the convex hull of the Minkowski sum

$$\sum_{j=1}^N \sum_{k=1}^N \frac{N_n(a_j, b_k)}{n} \{B(L(a_j, b_k)), E(L(a_j, b_k))\}.$$

1021 In other words, if we denote by  $M_N$  the set of all  $N \times N$  matrices with entries either zero or one,  
 1022 the set  $A$  can also be described as the convex hull of the points

$$q_y^n := \sum_{j=1}^N \sum_{k=1}^N \frac{N_n(a_j, b_k)}{n} \left( y_{jk} B(L(a_j, b_k)) + (1 - y_{jk}) E(L(a_j, b_k)) \right),$$

1023 for  $y \in M_N$ , that is

$$A_n = \text{Conv.Hull} \left\{ \bigcup_{y \in M_N} q_y^n \right\}. \quad (\text{C.3.2})$$

1024 Note that the set  $\{q_y^n\}_{y \in M_N}$  is a subset of  $\{p_x^n\}_{x \in M^n}$ , while we established previously that  $p_x^n \in A_n$  for  
 1025 every  $x \in M^n$ . Hence, also

$$A_n = \text{Conv.Hull} S_n.$$

1026 The final statement to check is that every point in  $A_n$  is within distance  $C/n$  to some point  $p_x^n$ .  
 1027 Let therefore  $a \in A_n$ . Then

$$a = \sum_{y \in M_N} \lambda_y q_y^n$$

1028 for some constants  $\lambda_y \geq 0$  with  $\sum_y \lambda_y = 1$ . If we plug in the definition of  $q_y^n$  and switch the order of  
 1029 summation, we may write  $a$  as

$$a = \sum_{j=1}^N \sum_{k=1}^N \frac{N_n(a_j, b_k)}{n} \left( \left( \sum_y \lambda_y y_{jk} \right) B(L(a_j, b_k)) + \left( 1 - \left( \sum_y \lambda_y y_{jk} \right) \right) E(L(a_j, b_k)) \right),$$

1030 where we used that  $\sum_y \lambda_y = 1$ . Then choose  $x_{jk}$  such that

$$\frac{x_{jk}}{N_n(a_j, b_k)} \approx \sum_y \lambda_y y_{jk},$$

1031 the error being bounded by at most  $1/N_n(a_j, b_k)$ .

1032 The distance between  $a$  and

$$p_x^n = \sum_{j=1}^N \sum_{k=1}^N \frac{N_n(a_j, b_k)}{n} \left( \frac{x_{jk}}{N_n(a_j, b_k)} B(L(a_j, b_k)) + \left( 1 - \left( \sum_y \frac{x_{jk}}{N_n(a_j, b_k)} \right) \right) E(L(a_j, b_k)) \right),$$

1033 is therefore bounded by  $C/n$  for some constant  $C$  depending on  $N$  and the distance of the  $a_j$  and  $b_k$   
 1034 to 0 and 1. This finishes the proof of the theorem.

### 1035 C.3.1 A practical method to compute the accessible set $A$

1036 The previous description (C.3.2) provides a way to compute the set  $A_n$  and a similar formula can be  
 1037 derived for  $A$ . However, it is not very efficient. In this section we will provide a more efficient way to  
 1038 calculate  $A$ , by specifying its boundary.

1039 First we order the points  $(a_j, b_k)$  according to the angles

$$\alpha_{jk} = \arccos \frac{E(L(a_j, b_k))_1 - B(L(a_j, b_k))_1}{\text{length}(L(a_j, b_k))}.$$

1040 In other words, for  $\ell = 1, \dots, N^2$ , we let  $j(\ell)$  and  $k(\ell)$  be such that

$$\alpha_\ell \leq \alpha_{\ell+1},$$

1041 where we used shorthand  $\alpha_\ell = \alpha_{j(\ell)k(\ell)}$ , and  $\ell \mapsto (j(\ell), k(\ell))$  is surjective onto  $\{1, \dots, N\}^2$ .

1042 Next, with obvious abbreviations, we define vectors

$$v_\ell := f_\ell(E_\ell - B_\ell)$$

1043 and

$$w_\ell := f_\ell B_\ell, \quad w := \sum_{\ell=1}^{N^2} w_\ell.$$

1044 It is immediate from the definitions that the set  $A$  can also be written as

$$\begin{aligned} A &= w + \text{Conv.Hull} \bigcup_{y \in \{0,1\}^{N^2}} \sum_{\ell=1}^{N^2} y_\ell v_\ell \\ &= w + \bigcup_{\lambda \in [0,1]^{N^2}} \sum_{\ell=1}^{N^2} \lambda_\ell v_\ell. \end{aligned}$$

1045 We claim that

$$A = w + \text{Conv.Hull}(v_1, v_1 + v_2, \dots, v_1 + \dots + v_{N^2}, v_2 + v_3 + \dots + v_{N^2}, \dots, v_{N^2}).$$

1046 To see this, we first note that we may without loss of generality assume that  $w = 0$ , and that the  
1047 slopes of  $v_{\ell_1}$  and  $v_{\ell_2}$  are different when  $\ell_1 \neq \ell_2$ .

1048 By the definition of  $B_\ell$  and  $E_\ell$ , we know that for every  $\ell$ , the vector  $v_\ell$  either points to the right or  
1049 lies in the upper halfplane. Note that the origin lies in  $A$ , as do the line segments  $[0, v_1]$  and  $[0, v_{N^2}]$ .  
1050 Moreover, the set  $A$  lies in the smaller cone bounded by the rays starting from the origin with the  
1051 directions of  $v_1$  and  $v_{N^2}$  respectively. It follows that the origin is an extreme point of the convex  
1052 polyhedron  $A$ .

1053 Note that for  $k = 1, \dots, N^2 - 1$  we may alternatively write  $A$  as

$$A = \sum_{\ell=1}^k v_\ell + \bigcup_{\lambda \in [0,1]^{N^2}} \left( \sum_{\ell=1}^k \lambda_1(-v_\ell) + \sum_{\ell=k+1}^{N^2} \lambda_\ell v_\ell \right).$$

1054 This representation of  $A$  allows one to check that for every  $k = 1, \dots, N^2$ ,

$$\sum_{\ell=1}^k v_\ell$$

1055 is an extreme point of  $A$ , while the line segments

$$\left[ \sum_{\ell=1}^k v_\ell, \sum_{\ell=1}^{k+1} v_\ell \right]$$

1056 are faces of  $A$ . Indeed, it is clear that the points and line segments lie in  $A$ . On the other hand,  $A$  is  
1057 contained in the smaller cone bounded by the rays with starting point

$$\sum_{\ell=1}^k v_\ell$$

1058 and directions  $-v_k$  and  $v_{k+1}$  respectively. A similar argument shows that the points

$$\sum_{\ell=k}^{N^2} v_\ell$$

1059 are extreme points and the line segments

$$\left[ \sum_{\ell=k}^{N^2} v_\ell, \sum_{\ell=k+1}^{N^2} v_\ell \right]$$

1060 are faces. Hence, we have shown that

$$A = w + \text{Conv.Hull}(v_1, v_1 + v_2, \dots, v_1 + \dots + v_{N^2}, v_2 + v_3 + \dots + v_{N^2}, \dots, v_{N^2}).$$

1061 This description allows for fast checks whether or not a point lies in  $A$ .
